# Supplementary material for: Fluoro-glycosyl acridinones are ultra-sensitive active site titrating agents for retaining β-glycosidases
Source: Royal Society of Chemistry journal article supplement (doi:10.1039/c4cc03299c), 2014-01-01

# Fluoro-glycosyl acridinones are ultra-sensitive active site titrating agents for retaining $\beta$ -glycosidases

Tianmeng Duo,<sup>a</sup> Ethan D. Goddard-Borger<sup>a,b</sup> and Stephen G. Withers<sup>a\*</sup>

<sup>a</sup> The Department of Chemistry, The University of British Columbia, 2036 Main Mall, Vancouver, BC, Canada V6T 1Z1.

<sup>b</sup> Current address: The Walter and Eliza Hall Institute of Medical Research, 1G Royal Parade, Parkville, Vic, Australia 3052

\* To whom correspondence should be addressed.

## Contents

|                                                                  |    |
|------------------------------------------------------------------|----|
| Materials and methods                                            | 2  |
| Synthesis and characterization                                   | 2  |
| General procedure for the synthesis of glycosyl bromides         | 2  |
| General procedure for Koenigs-Knorr reactions                    | 2  |
| General procedure for deacetylation                              | 3  |
| Synthetic chemistry experimental information                     | 3  |
| Kinetic analysis                                                 | 10 |
| General procedure for indirect inactivation assays               | 10 |
| General procedure for direct inactivation assays                 | 11 |
| General procedure for direct inactivation assays by stopped flow | 11 |
| pK <sub>a</sub> Determinations                                   | 11 |
| Extinction coefficient determinations                            | 11 |
| Active site titrations of Abg by fluorimetry                     | 12 |
| References                                                       | 13 |
| NMR spectra                                                      | 14 |

## Materials and methods

All fine chemicals were obtained from commercial suppliers (Sigma-Aldrich<sup>®</sup> and Fisher Scientific<sup>®</sup>). Methanol was distilled over Mg and MeCN was distilled over CaH<sub>2</sub>. Deionized water was prepared using a Millipore-Directed QTM 5 Ultrapure Water System. TLC was performed on Merck pre-coated 0.2 mm aluminum-backed sheets of Silica Gel 60F<sub>254</sub>. TLC plates were stained in 10% sulfuric acid in EtOH or 10% ammonium molybdate in 2 M H<sub>2</sub>SO<sub>4</sub>, followed by development by heating. Flash column chromatography was performed using 230-400 mesh Silicycle<sup>®</sup> silica gel. <sup>1</sup>H and <sup>13</sup>C NMR spectra were acquired on a 300 or 400 MHz Bruker<sup>®</sup> spectrometer. Mass spectra were obtained using a Waters<sup>®</sup> ZQ Mass Detector equipped with ESCI ion source. LacZ was obtained from Sigma-Aldrich<sup>®</sup> and human GCase was obtained from Genzyme<sup>®</sup> as the recombinant drug Cerezyme<sup>®</sup>. *T. reesei* EG-I cellulase was a generous gift from the Iogen<sup>®</sup> corporation. Abg, Bhx and Cex were expressed in-house according to established procedures.<sup>1-3</sup>

## Synthesis and characterization

### General procedure for the synthesis of glycosyl bromides

The per-*O*-acetylated 2-deoxy-2-fluoro-sugar<sup>4</sup> was dissolved in DCM (1 ml/mmol sugar) under argon and cooled in an ice bath. Hydrogen bromide in AcOH (33% w/w, 0.5 ml/mmol sugar) was added drop-wise and the solution was stirred at r.t. Upon completion of the reaction (as determined by TLC), the mixture was diluted with DCM and washed with sat. NaHCO<sub>3</sub> until the aqueous layer was basic, followed by brine. The organic layer was dried with anhydrous MgSO<sub>4</sub>, filtered and the solvent evaporated under reduced pressure. These products were used immediately in further syntheses.

### General procedure for Koenigs-Knorr reactions

Glycosyl bromide in dry MeCN (2.0 ml/mmol glycosyl bromide) was added to a well-stirred suspension of DDAO (1.0 mol eqv.), 2,6-lutidine (2.0 mol eqv.), Ag<sub>2</sub>O (2.0 mol eqv.) and CaSO<sub>4</sub> (300 mg/mmol glycosyl bromide) in MeCN (10 ml/mmol glycosyl bromide) under argon. The reaction was protected from light and stirred at r.t. overnight. The reaction was filtered through diatomaceous earth, washed with sat. NaHCO<sub>3</sub> and brine, dried with anhydrous MgSO<sub>4</sub>, filtered and concentrated under reduced pressure. The products were purified by flash chromatography and/or recrystallized to homogeneity.

### General procedure for deacetylation

The per-*O*-acetylated glycoside was dissolved in dry MeOH (1–2 ml MeOH per 10 mg sugar) and cooled to 0°C. Sodium methoxide in MeOH (380 mM) was added drop-wise to give a final concentration of 20 mM. The reaction was stirred at r.t. Upon completion (as determined by TLC), the reaction was neutralized with acid resin (Amberlite® IR-120, H<sup>+</sup>), filtered and concentrated under reduced pressure. Purification was carried out by flash chromatography on silica gel or recrystallization (MeOH) to homogeneity.

### Synthetic chemistry experimental information

#### *9H*-(1,3-Dichloro-9,9-dimethylacridin-7-on-2-yl) 3,4,6-tri-*O*-acetyl-2-deoxy-2-fluoro-β-D-glucopyranoside (**8**)

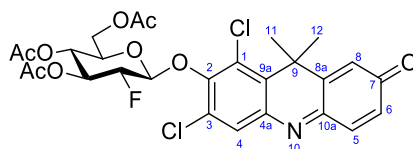

1,3,4,6-Tetra-*O*-acetyl-2-deoxy-2-fluoro-D-glucose<sup>5</sup> (448 mg, 1.20 mmol), was treated according to the general procedure for the synthesis of glycosyl bromides. The product was coupled to DDAO according to the general procedure for Koenigs-Knorr reactions. The crude product was purified by iterative flash chromatography (Me<sub>2</sub>CO/hexanes, 1:9–3:17 then hexanes/DCM/EtOAc, 2:2:1). This material was recrystallized (Me<sub>2</sub>CO/hexanes) to give glucoside **8** as yellow needles (230 mg, 32%). **HRMS** mass calculated for C<sub>27</sub>H<sub>26</sub>Cl<sub>2</sub>FNNaO<sub>9</sub>: 620.0866; found: 620.0880 [M+Na]<sup>+</sup>. **<sup>1</sup>H NMR** (400 MHz, CDCl<sub>3</sub>) δ ppm 1.78 (s, 3 H, CH<sub>3</sub>(Ar)) 1.80 (s, 3 H, CH<sub>3</sub>(Ar)) 2.01 (s, 3 H, C(O)CH<sub>3</sub>) 2.04 (s, 3 H, C(O)CH<sub>3</sub>) 2.12 (s, 3 H, C(O)CH<sub>3</sub>) 3.72 (ddd, 1 H, *J*<sub>H5-H4</sub> 10.0 *J*<sub>H5-H6</sub> 4.7 *J*<sub>H5-H6'</sub> 2.6 Hz, H5) 4.11 (dd, 1 H, *J*<sub>H6'-H6</sub> 12.2 *J*<sub>H6'-H5</sub> 2.6 Hz, H6') 4.20 (dd, 1 H, *J*<sub>H6-H6'</sub> 12.2 *J*<sub>H6-H5</sub> 4.7 Hz, H6) 4.74 (ddd, 1 H, *J*<sub>H2-F</sub> 50.7 *J*<sub>H2-H3</sub> 9.0 *J*<sub>H2-H1</sub> 7.6 Hz, H2) 5.17 (dd, 1 H, *J*<sub>H4-H3</sub> 9.7 *J*<sub>H4-H5</sub> 10.0 Hz, H4) 5.38 (dd, 1 H, *J*<sub>H1-H2</sub> 7.6, *J*<sub>H1-F2</sub> 2.4 Hz, H1) 5.42 (ddd, 1 H, *J*<sub>H3-F2</sub> 14.6 *J*<sub>H3-H2</sub> 9.0 *J*<sub>H3-H4</sub> 9.7 Hz, H3) 6.67 (d, 1 H, *J*<sub>H8(Ar)-H6(Ar)</sub> 1.8 Hz, H8(Ar)) 6.67 (dd, 1 H, *J*<sub>H6(Ar)-H5(Ar)</sub> 10.2 *J*<sub>H6(Ar)-H8(Ar)</sub> 1.8 Hz, H6(Ar)) 7.36 (d, 1 H, *J*<sub>H5(Ar)-H6(Ar)</sub> 10.2 Hz, H5(Ar)) 7.75 (s, 1 H, H4(Ar)) **<sup>19</sup>F NMR** (282 MHz, CDCl<sub>3</sub>) δ ppm -199.25 (ddd, *J*<sub>F2-H2</sub> 50.7 *J*<sub>F2-H3</sub> 14.6 *J*<sub>F2-H1</sub> 2.4 Hz, F2) **<sup>13</sup>C NMR** (101 MHz, CDCl<sub>3</sub>) δ ppm 20.86 (C(O)CH<sub>3</sub>), 20.93 (C(O)CH<sub>3</sub>), 20.97 (C(O)CH<sub>3</sub>), 29.10 (CH<sub>3</sub>(Ar)), 29.16 (CH<sub>3</sub>(Ar)), 38.41 (C9(Ar)), 61.72 (C6), 68.33 (d, *J*<sub>C4-F2</sub> 6.9 Hz, C4) 72.56 (C5), 72.86 (d, *J*<sub>C3-F2</sub> 19.9 Hz, C3), 90.04 (d, *J*<sub>C2-F2</sub> 194.7 Hz, C2), 100.69 (d, *J*<sub>C1-F2</sub> 23.0 Hz, C1),

128.54, 129.19 (C<sub>8(Ar)</sub>), 130.48 (C<sub>6(Ar)</sub>), 132.67 (C<sub>4(Ar)</sub>), 132.91, 133.59, 141.05, 141.20 (C<sub>5(Ar)</sub>), 148.55, 149.81 (C<sub>2(Ar)</sub>), 153.50, 169.77 (C(O)CH<sub>3</sub>), 170.31 (C(O)CH<sub>3</sub>), 170.62 (C(O)CH<sub>3</sub>), 187.54 (C=O<sub>(Ar)</sub>).

9*H*-(1,3-Dichloro-9,9-dimethylacridin-7-on-2-yl) 2-deoxy-2-fluoro-β-D-glucopyranoside  
(DDAO-2FGlc) (**1**)

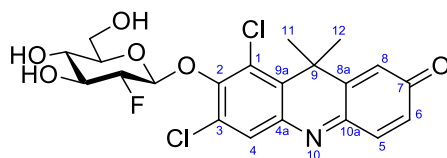

Compound **8** (53 mg, 0.089 mmol) was treated according to the general procedure for deacetylation. The crude product was purified by flash chromatography (EtOAc/hexanes, 3:2–4:1) to give polyol **1** as a yellow powder (38 mg, 91%). **HRMS** mass calculated for C<sub>21</sub>H<sub>20</sub>Cl<sub>2</sub>FNNaO<sub>6</sub>: 494.0549; found: 494.0562 [M+Na]<sup>+</sup>. **<sup>1</sup>H NMR** (400 MHz, CD<sub>3</sub>OD) δ ppm 1.83 (s, 6 H, 2 × CH<sub>3</sub>) 3.34 (m, H5) 3.44 (t, 1 H, *J*<sub>H4-H3</sub>=*J*<sub>H4-H5</sub> 9.3 Hz, H, H4) 3.65 (dd, 1 H, *J*<sub>H6-H6'</sub> 12.0 *J*<sub>H6-H5</sub> 5.8 Hz, H6) 3.70 (ddd, 1 H, *J*<sub>H3-F2</sub> 16.0 *J*<sub>H3-H2</sub> 8.9 *J*<sub>H3-H4</sub> 9.3 Hz, H3) 3.80 (dd, 1 H, *J*<sub>H6'-H6</sub> 12.0 *J*<sub>H6'-H5</sub> 2.0 Hz, H6') 4.40 (ddd, 1 H, *J*<sub>H2-F2</sub> 51.4 *J*<sub>H2-H3</sub> 8.9 *J*<sub>H2-H1</sub> 7.8 Hz, H2) 5.41 (dd, 1 H, *J*<sub>H1-H2</sub> 7.8 *J*<sub>H1-F2</sub> 2.1 Hz, H1) 6.67 (dd, 1 H, *J*<sub>H6(Ar)-H5(Ar)</sub> 9.9 *J*<sub>H6(Ar)-H8(Ar)</sub> 1.8 Hz, H6<sub>(Ar)</sub>) 6.79 (d, 1 H, *J*<sub>H8(Ar)-H6(Ar)</sub> 1.8 Hz, H8<sub>(Ar)</sub>) 7.43 (d, 1 H, *J*<sub>H5(Ar)-H6(Ar)</sub> 9.9 Hz, H5<sub>(Ar)</sub>) 7.77 (s, 1 H, H4<sub>(Ar)</sub>) **<sup>19</sup>F NMR** (282 MHz, CD<sub>3</sub>OD) δ ppm -200.52 (ddd, *J*<sub>F2-H2</sub> 51.4 *J*<sub>F2-H3</sub> 16.0 *J*<sub>F2-H1</sub> 2.1 Hz, 93 F) **<sup>13</sup>C NMR** (101 MHz, CD<sub>3</sub>OD) δ ppm 29.09 (CH<sub>3(Ar)</sub>) 29.20 (CH<sub>3(Ar)</sub>) 39.60 (C9<sub>(Ar)</sub>) 62.52 (C6) 71.19 (d, *J*<sub>C4-F2</sub> 7.7 Hz, C4) 76.35 (d, *J*<sub>C3-F2</sub> 17.6 Hz, C3) 78.94 (C5) 94.25 (d, *J*<sub>C2-F2</sub> 187.8 Hz, C2) 102.39 (d, *J*<sub>C1-F2</sub> 26.1 Hz, C1) 129.68, 129.99 (C8<sub>(Ar)</sub>) 131.60, 133.30 (C6<sub>(Ar)</sub>) 133.63 (C4<sub>(Ar)</sub>) 134.97, 141.86, 142.48 (C5<sub>(Ar)</sub>) 150.46, 151.74 (C2<sub>(Ar)</sub>) 154.43, 189.14 (C=O<sub>(Ar)</sub>).

9*H*-(1,3-Dichloro-9,9-dimethylacridin-7-on-2-yl) 3,4,6-tri-*O*-acetyl-2-deoxy-2-fluoro-β-D-galactopyranoside (**11**)

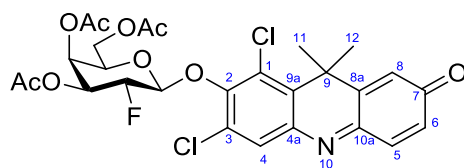

1,3,4,6-Tetra-*O*-acetyl-2-deoxy-2-fluoro-D-galactose<sup>6</sup> (430 mg, 1.23 mmol), was treated according to the general procedure for the synthesis of glycosyl bromides. The product was coupled to DDAO according to the general procedure for Koenigs-Knorr reactions. The crude product was purified by flash chromatography (EtOAc/hexanes, 3:7–1:1). This material was recrystallized

(Me<sub>2</sub>CO/Et<sub>2</sub>O/hexanes) to give galactoside **11** as yellow needles (130 mg, 18%). **HRMS** mass calculated for C<sub>27</sub>H<sub>26</sub>Cl<sub>2</sub>FNNaO<sub>9</sub> 620.0866; found 620.0859 [M+Na]<sup>+</sup>. **<sup>1</sup>H NMR** (400 MHz, CDCl<sub>3</sub>) δ ppm 1.80 (s, 3 H, CH<sub>3</sub>(Ar)) 1.82 (s, 3 H, CH<sub>3</sub>(Ar)) 1.98 (s, 3 H, C(O)CH<sub>3</sub>) 2.10 (s, 3 H, C(O)CH<sub>3</sub>) 2.21 (s, 3 H, C(O)CH<sub>3</sub>) 3.94 (td, 1 H, *J*<sub>H5-H6</sub>=*J*<sub>H5-H6'</sub> 7.0 *J*<sub>H5-H4</sub> 2.7 Hz, H5) 4.12 (m, 2 H, *J*<sub>H6-H6'</sub>=*J*<sub>H6'-H6</sub> 10.9, H6 H6') 4.93 (ddd, 1 H, *J*<sub>H2-F2</sub> 51.4 *J*<sub>H2-H3</sub> 9.7 *J*<sub>H2-H1</sub> 7.5 Hz, H2) 5.22 (ddd, 1 H, *J*<sub>H3-F2</sub> 13.1 *J*<sub>H3-H2</sub> 9.7 *J*<sub>H3-H4</sub> 3.5 Hz, H3) 5.36 (dd, 1 H, *J*<sub>H1-H2</sub> 7.5 *J*<sub>H1-F2</sub> 3.2 Hz, H1) 5.46 (dd, 1 H, *J*<sub>H4-H3</sub> 3.5 *J*<sub>H4-H5</sub> 2.7 Hz, H4) 6.69 (d, 1 H, *J*<sub>H8(Ar)-H6(Ar)</sub> 1.8 Hz, H8(Ar)) 6.69 (dd, 1 H, *J*<sub>H6(Ar)-H5(Ar)</sub> 9.9 *J*<sub>H6(Ar)-H8(Ar)</sub> 1.8 Hz, H6(Ar)) 7.38 (d, 1 H, *J*<sub>H5(Ar)-H6(Ar)</sub> 9.9 Hz, H5(Ar)) 7.77 (s, 1 H, H4(Ar)) **<sup>19</sup>F NMR** (282 MHz, CDCl<sub>3</sub>) δ ppm -206.63 (ddd, *J*<sub>F2-H2</sub> 51.4 *J*<sub>F2-H3</sub> 13.1 *J*<sub>F2-H1</sub> 3.2 Hz, 1 F) **<sup>13</sup>C NMR** (101 MHz, CDCl<sub>3</sub>) δ ppm 20.57 (3 C, 3 × C(O)CH<sub>3</sub>) 28.79 (CH<sub>3</sub>(Ar)) 28.86 (CH<sub>3</sub>(Ar)) 38.09 (C9(Ar)) 60.58 (C6) 67.27 (d, *J*<sub>C4-F2</sub> 8.4 Hz, C4) 70.80 (d, *J*<sub>C3-F2</sub> 18.3 Hz, C3) 71.28 (C5) 88.14 (d, *J*<sub>C2-F2</sub> 190.4 Hz, C2) 100.94 (d, *J*<sub>C1-F2</sub> 22.9 Hz, C1) 128.31, 128.88 (C8(Ar)) 130.14, 132.35 (C5(Ar)) 132.62 (C6(Ar)) 133.24, 140.70, 140.90 (C4(Ar)) 148.25, 149.67 (C2(Ar)) 153.16, 169.91 (C(O)CH<sub>3</sub>) 170.02 (C(O)CH<sub>3</sub>) 170.22 (C(O)CH<sub>3</sub>) 187.26 (C=O(Ar)).

9*H*-(1,3-Dichloro-9,9-dimethylacridin-7-on-2-yl) 2-deoxy-2-fluoro-β-D-galactopyranoside

(DDAO-2FGal) (**2**)

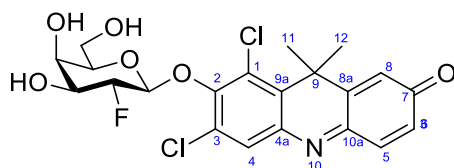

Compound **11** (93 mg, 0.15 mmol) was treated according to the general procedure for deacetylation. The crude product was purified by flash chromatography (EtOAc/hexanes, 4:1) to give polyol **2** as a yellow powder (61 mg, 84%). **HRMS** mass calculated for C<sub>21</sub>H<sub>20</sub>Cl<sub>2</sub>FNNaO<sub>6</sub>: 494.0549; found: 494.0547 [M+Na]<sup>+</sup>. **<sup>1</sup>H NMR** (400 MHz, 30% CDCl<sub>3</sub> 70% CD<sub>3</sub>OD) δ ppm 1.82 (s, 3 H, CH<sub>3</sub>(Ar)) 1.82 (s, 3 H, CH<sub>3</sub>(Ar)) 3.55 (m, 1 H, *J*<sub>H5-H6</sub> 6.7 *J*<sub>H5-H6'</sub> 5.9, H5) 3.69 (dd, 1 H, *J*<sub>H6'-H6</sub> 11.1 *J*<sub>H6'-H5</sub> 5.9 Hz, H6') 3.77 (dd, 1 H, *J*<sub>H6-H6'</sub> 11.1 *J*<sub>H6'-H5</sub> 6.7 Hz, H6) 3.83 (ddd, 1 H, *J*<sub>H3-F2</sub> 14.3 *J*<sub>H3-H2</sub> 9.2 *J*<sub>H3-H4</sub> 3.2 Hz, H3) 3.98 (m, 1 H, *J*<sub>H4-H3</sub> 3.2 Hz, H4) 4.77 (ddd, 1 H, *J*<sub>H2-F2</sub> 52.2 *J*<sub>H2-H3</sub> 9.2 *J*<sub>H2-H1</sub> 7.4 Hz, H2) 5.30 (dd, 1 H, *J*<sub>H1-H2</sub> 7.4 *J*<sub>H1-F2</sub> 3.0 Hz, H1) 6.67 (dd, 1 H, *J*<sub>H6(Ar)-H5(Ar)</sub> 9.7 *J*<sub>H6(Ar)-H8(Ar)</sub> 1.9 Hz, H6(Ar)) 6.73 (d, 1 H, *J*<sub>H8(Ar)-H6(Ar)</sub> 1.9 Hz, H8(Ar)) 7.41 (d, 1 H, *J*<sub>H5(Ar)-H6(Ar)</sub> 9.7 Hz, H5(Ar)) 7.74 (s, 1 H, H4(Ar)) **<sup>19</sup>F NMR** (282 MHz, 30% CDCl<sub>3</sub> 70% CD<sub>3</sub>OD) δ ppm -207.88 (ddd, *J*<sub>F2-H2</sub> 52.2 *J*<sub>F2-H3</sub> 14.3 *J*<sub>F2-H1</sub> 3.0 Hz, F2) **<sup>13</sup>C NMR** (101 MHz, 30% CDCl<sub>3</sub> 70% CD<sub>3</sub>OD) δ ppm 29.13 (CH<sub>3</sub>(Ar)) 29.19 (CH<sub>3</sub>(Ar)) 39.14 (C9(Ar)) 61.30 (C6) 70.00 (d, *J*<sub>C4-F2</sub> 8.4 Hz, C4) 72.85 (d, *J*<sub>C3-F2</sub> 17.6 Hz, C3) 76.84 (C5) 92.93 (d, *J*<sub>C2-F2</sub> 179.4 Hz, C2)

102.58 (d,  $J_{C1-F2}$  27.6 Hz, C1) 129.30 (C8<sub>(Ar)</sub>) 129.53, 131.26, 132.91 (C6<sub>(Ar)</sub>) 133.36 (C4<sub>(Ar)</sub>) 134.3, 141.20, 142.07 (C5<sub>(Ar)</sub>) 150.02, 151.55 (C2<sub>(Ar)</sub>) 153.75, 188.74 (C=O<sub>(Ar)</sub>).

9*H*-(1,3-Dichloro-9,9-dimethylacridin-7-on-2-yl) 3,4-di-*O*-acetyl-2-deoxy-2-fluoro- $\beta$ -D-xylopyranoside (**13**)

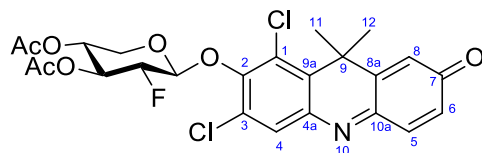

1,3,4-Tri-*O*-acetyl-2-deoxy-2-fluoro-D-xylose<sup>7</sup> (430 mg, 1.61 mmol), was treated according to the general procedure for the synthesis of glycosyl bromides. The product was coupled to DDAO according to the general procedure for Koenigs-Knorr reactions. The crude product was purified by flash chromatography (EtOAc/hexanes, 3:7–1:1). This material was recrystallized (EtOAc/hexanes) to give xyloside **13** as a yellow powder (211 mg, 31%). **HRMS** mass calculated for C<sub>24</sub>H<sub>23</sub>Cl<sub>2</sub>FNNaO<sub>7</sub>: 548.0655; found: 548.0654 [M+Na]<sup>+</sup>. **<sup>1</sup>H NMR** (400 MHz, CDCl<sub>3</sub>)  $\delta$  ppm 1.84 (s, 6 H, 2  $\times$  CH<sub>3</sub>) 2.13 (s, 3 H, C(O)CH<sub>3</sub>) 2.20 (s, 3 H, C(O)CH<sub>3</sub>) 3.62 (dd, 1 H,  $J_{H5ax-H5eq}$  12.56  $J_{H5ax-H4}$  6.02 Hz, H5<sub>ax</sub>) 4.47 (dd, 1 H,  $J_{H5eq-H5ax}$  12.56  $J_{H5eq-H4eq}$  4.19 Hz, H5<sub>eq</sub>) 4.89 (ddd, 1 H,  $J_{H2-F2}$  47.97  $J_{H2-H3}$  7.31  $J_{H2-H1}$  5.03 Hz, H2) 5.07 (td, 1 H,  $J_{H4-H3}=J_{H4-H5ax}$  6.28,  $J_{H4-H5eq}$  4.34 Hz, H4) 5.40 (dt,  $J_{H3-F2}$  12.79  $J_{H3-H2}=J_{H3-H4}$  7.00 Hz, 1 H) 5.55 (dd, 1 H,  $J_{H1-F2}$  8.15  $J_{H1-H2}$  4.95 Hz, H1) 6.71 (d, 1 H,  $J_{H8(Ar)-H6(Ar)}$  1.68 Hz, H8<sub>(Ar)</sub>) 6.71 (dd, 1 H,  $J_{H6(Ar)-H5(Ar)}$  10.51  $J_{H6(Ar)-H8(Ar)}$  1.83 Hz, H6<sub>(Ar)</sub>) 7.40 (d, 1 H,  $J_{H5(Ar)-H6(Ar)}$  10.20 Hz, H5<sub>(Ar)</sub>) 7.81 (s, 1 H, H4<sub>(Ar)</sub>) **<sup>19</sup>F NMR** (282 MHz, CDCl<sub>3</sub>)  $\delta$  ppm -196.96 (ddd,  $J_{F2-H2}$  48.43  $J_{F2-H3}$  13.82  $J_{F2-H1}$  7.54 Hz, F2) **<sup>13</sup>C NMR** (101 MHz, CDCl<sub>3</sub>)  $\delta$  ppm 20.92 (CH<sub>3</sub> <sub>(Ar)</sub>) 28.92 (C(O)CH<sub>3</sub>) 29.04 (C(O)CH<sub>3</sub>) 38.25 (C9<sub>(Ar)</sub>) 62.62 (C5) 68.46 (d,  $J_{C4-F2}$  4.60 Hz, C4) 69.74 (d,  $J_{C3-F2}$  24.54 Hz, C3) 87.86 (d,  $J_{C2-F2}$  183.26 Hz, C2) 101.06 (d,  $J_{C1-F2}$  29.14 Hz, C1) 128.30, 129.00 (C8<sub>(Ar)</sub>) 130.00, 132.47 (C6<sub>(Ar)</sub>) 132.85 (C4<sub>(Ar)</sub>) 133.51, 140.75, 141.04 (C5<sub>(Ar)</sub>) 148.37, 150.48 (C2<sub>(Ar)</sub>) 153.23, 169.83 (C(O)CH<sub>3</sub>) 170.19 (C(O)CH<sub>3</sub>) 187.39 (C=O<sub>(Ar)</sub>).

9*H*-(1,3-Dichloro-9,9-dimethylacridin-7-on-2-yl) 2-deoxy-2-fluoro- $\beta$ -D-xylopyranoside

(DDAO-2FXyl) (**3**)

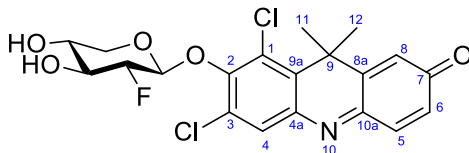

Compound **13** (88 mg, 0.17 mmol) was treated according to the general procedure for deacetylation. The crude product was purified by flash chromatography (EtOAc/hexanes, 4:1) to give polyol **3** as a yellow powder (78 mg, 99%). **HRMS** mass calculated for C<sub>20</sub>H<sub>18</sub>Cl<sub>3</sub>FNO<sub>5</sub>: 476.0235; found: 476.0237 [M+Cl]<sup>-</sup>. **<sup>1</sup>H NMR** (400 MHz, CDCl<sub>3</sub>)  $\delta$  ppm 1.81 (s, 3 H, CH<sub>3</sub>(Ar)) 1.81 (s, 3 H, CH<sub>3</sub>(Ar)) 2.48 (br. s., 1 H, OH) 2.75 (br. s., 1 H, OH) 3.43 (dd, 1 H,  $J_{H5ax-H5eq}$  11.9  $J_{H5ax-H4}$  7.5 Hz, H5<sub>ax</sub>) 3.88 (td, 1 H,  $J_{H4-H3}$  =  $J_{H4-H5ax}$  7.5  $J_{H4-H5eq}$  4.6 Hz, H4) 3.94 (dt, 1 H,  $J_{H3-F2}$  13.5  $J_{H3-H2}$  =  $J_{H3-H4}$  7.5 Hz, H3) 4.28 (dd, 1 H,  $J_{H5eq-H5ax}$  11.9  $J_{H5eq-H4}$  4.6 Hz, H5<sub>eq</sub>) 4.71 (ddd, 1 H,  $J_{H2-F2}$  49.6  $J_{H2-H3}$  7.5  $J_{H2-H1}$  6.1 Hz, H2) 5.42 (dd, 1 H,  $J_{H1-H2}$  6.1  $J_{H1-F2}$  4.6 Hz, H1) 6.68 (d, 1 H,  $J_{H8(Ar)-H6(Ar)}$  1.7 Hz, H8(Ar)) 6.69 (dd, 1 H,  $J_{H6(Ar)-H5(Ar)}$  9.9  $J_{H6(Ar)-H8(Ar)}$  1.7 Hz, H6(Ar)) 7.37 (d, 1 H,  $J_{H5(Ar)-H6(Ar)}$  9.9 Hz, H5(Ar)) 7.78 (s, 1 H, H4(Ar)) **<sup>19</sup>F NMR** (282 MHz, CDCl<sub>3</sub>)  $\delta$  ppm -200.66 (ddd,  $J_{F2-H2}$  49.6  $J_{F2-H3}$  13.5  $J_{F2-H1}$  4.6 Hz, 1 F) **<sup>13</sup>C NMR** (101 MHz, CDCl<sub>3</sub>)  $\delta$  ppm 28.93 (CH<sub>3</sub> (Ar)) 29.04 (CH<sub>3</sub> (Ar)) 38.26 (C<sub>9</sub>(Ar)) 65.22 (C<sub>5</sub>) 69.12 (d,  $J_{C4-F2}$  5.3 Hz, C<sub>4</sub>) 73.69 (d,  $J_{C3-F2}$  19.1 Hz, C<sub>3</sub>) 91.05 (d,  $J_{C2-F2}$  186.3 Hz, C<sub>2</sub>) 101.32 (d,  $J_{C1-F2}$  26.0 Hz, C<sub>1</sub>) 128.28, 129.00 (C<sub>8</sub>(Ar)) 130.09, 132.46 (C<sub>4</sub>(Ar)) 132.84, 133.46, 140.75, 141.07 (C<sub>5</sub>(Ar)) 148.42, 150.32 (C<sub>2</sub>(Ar)), 153.20, 187.44 (C=O(Ar)).

1,3,6,2',3',4',6'-Hepta-*O*-acetyl-2-deoxy-2-fluoro- $\alpha$ -cellobiose (**15**)

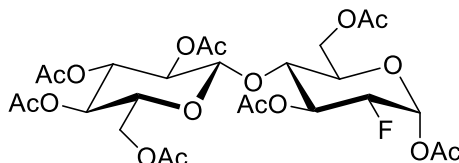

Per-*O*-acetyl cellobial<sup>8</sup> **14** (6.7 g, 12 mmol) and Selectfluor<sup>®</sup> (6.0 g, 18 mmol, 1.5 eqv.) were dissolved in MeNO<sub>2</sub> (100 ml) and water (20 ml). The reaction was warmed to ambient temperature and stirred for 72 h. The mixture was diluted with EtOAc and washed with sat. NaHCO<sub>3</sub> followed by brine. The organic layer was dried with anhydrous MgSO<sub>4</sub>, filtered and the solvent evaporated under reduced pressure. The mixture (4 g) was dissolved in pyridine (25 ml) and Ac<sub>2</sub>O (120 ml) and stirred at r.t. overnight. The mixture was evaporated under reduced pressure, diluted with EtOAc and washed with 1N HCl, water, sat. NaHCO<sub>3</sub> then brine. The organic layer was dried with anhydrous MgSO<sub>4</sub>, filtered and the solvent evaporated under reduced pressure. Iterative recrystallization (CHCl<sub>3</sub>/Et<sub>2</sub>O) gave the

fluorosugar **15** (250 mg, 12% yield).  $^1\text{H}$  and  $^{19}\text{F}$  NMR spectral data were commensurate with those previously reported.<sup>9</sup>

*9H*-(1,3-Dichloro-9,9-dimethylacridin-7-on-2-yl) 3,6,2',3',4',6'-hexa-*O*-acetyl-2-deoxy-2-fluoro- $\beta$ -cellobioside (**16**)

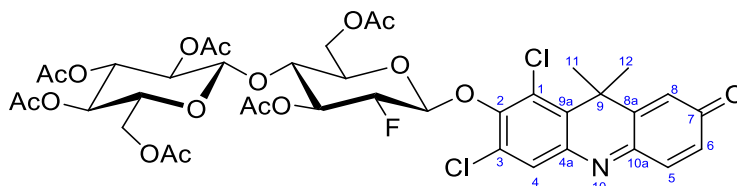

Per-*O*-acetyl-2-deoxy-2-fluoro-cellobiose **15** (100 mg, 0.16 mmol), was treated according to the general procedure for the synthesis of glycosyl bromides. The product was coupled to DDAO according to the general procedure for Koenigs-Knorr reactions. The crude product was purified by flash chromatography (EtOAc/DCM/MePh, 1:2:2) to give cellobioside **16** as a yellow powder (12 mg, 8%). **HRMS**: mass calculated for  $\text{C}_{39}\text{H}_{42}\text{Cl}_2\text{FNNaO}_{17}$ : 908.1712; found: 908.1707,  $[\text{M}+\text{Na}]^+$ .  $^1\text{H}$  NMR (400 MHz,  $\text{CDCl}_3$ )  $\delta$  ppm 1.79 (s, 3 H,  $\text{CH}_3(\text{Ar})$ ) 1.80 (s, 3 H,  $\text{CH}_3(\text{Ar})$ ) 1.99 (s, 3 H,  $\text{C}(\text{O})\text{CH}_3$ ) 2.00 (s, 3 H,  $\text{C}(\text{O})\text{CH}_3$ ) 2.02 (s, 3 H,  $\text{C}(\text{O})\text{CH}_3$ ) 2.06 (s, 3 H,  $\text{C}(\text{O})\text{CH}_3$ ) 2.11 (s, 3 H,  $\text{C}(\text{O})\text{CH}_3$ ) 2.14 (s, 3 H,  $\text{C}(\text{O})\text{CH}_3$ ) 3.61 (ddd,  $J_{\text{H}5-\text{H}4}$  9.7  $J_{\text{H}5-\text{H}6a}$  4.8  $J_{\text{H}5-\text{H}6b}$  2.1 Hz, 1 H, H5) 3.69 (ddd,  $J_{\text{H}5'-\text{H}4'}$  9.9  $J_{\text{H}5'-\text{H}6'a}$  4.2  $J_{\text{H}5'-\text{H}6'b}$  2.0 Hz, 1 H, H5') 3.88 (dd,  $J_{\text{H}4-\text{H}3}$  9.0  $J_{\text{H}4-\text{H}5}$  9.7 Hz, 1 H, H4) 4.07 (dd,  $J_{\text{H}6a-\text{H}6b}$  12.1  $J_{\text{H}6a-\text{H}5}$  4.8 Hz, 1 H, H6a) 4.08 (d,  $J_{\text{H}6'b-\text{H}6'a}$  12.4  $J_{\text{H}6'b-\text{H}5'}$  2.0 Hz, 1 H, H6'b) 4.39 (dd,  $J_{\text{H}6'a-\text{H}6'b}$  12.4  $J_{\text{H}6'a-\text{H}5'}$  4.2 Hz, 1 H, H6'a) 4.51 (dd,  $J_{\text{H}6b-\text{H}6a}$  12.1  $J_{\text{H}6b-\text{H}5}$  2.1 Hz, 1 H, H6b) 4.55 (d,  $J_{\text{H}1'-\text{H}2'}$  7.9 Hz, 1 H, H1') 4.66 (ddd,  $J_{\text{H}2-\text{F}2}$  50.2  $J_{\text{H}2-\text{H}3}$  9.0  $J_{\text{H}2-\text{H}1}$  7.4 Hz, 1 H, H2) 4.94 (dd,  $J_{\text{H}2'-\text{H}3'}$  9.2  $J_{\text{H}2'-\text{H}1'}$  7.9 Hz, 1 H, H2') 5.09 (dd,  $J_{\text{H}4'-\text{H}3'}$  9.2  $J_{\text{H}4'-\text{H}5'}$  9.9 Hz, 1 H, H4') 5.16 (t,  $J_{\text{H}3'-\text{H}2'}$  =  $J_{\text{H}3'-\text{H}4'}$  9.2 Hz, 1 H, H3') 5.35 (dd,  $J_{\text{H}1-\text{H}2}$  7.4  $J_{\text{H}1-\text{F}2}$  2.2 Hz, 1 H, H1) 5.40 (dt,  $J_{\text{H}3-\text{F}2}$  14.7  $J_{\text{H}3-\text{H}2}$  =  $J_{\text{H}3-\text{H}4}$  9.0 Hz, 1 H, H3) 6.68 (d,  $J_{\text{H}8(\text{Ar})-\text{H}6(\text{Ar})}$  1.8 Hz, 1 H, H8(Ar)) 6.68 (dd,  $J_{\text{H}6(\text{Ar})-\text{H}5(\text{Ar})}$  10.0  $J_{\text{H}6(\text{Ar})-\text{H}8(\text{Ar})}$  1.8 Hz, 1 H, H6(Ar)) 7.36 (d,  $J_{\text{H}5(\text{Ar})-\text{H}6(\text{Ar})}$  10.0 Hz, 1 H, H5(Ar)) 7.75 (s, 1 H, H4(Ar))  $^{19}\text{F}$  NMR (282 MHz,  $\text{CDCl}_3$ )  $\delta$  ppm -198.87 (ddd,  $J_{\text{F}2-\text{H}2}$  50.2  $J_{\text{F}2-\text{H}3}$  14.7  $J_{\text{F}2-\text{H}1}$  2.2 Hz, F2)  $^{13}\text{C}$  NMR (101 MHz,  $\text{CDCl}_3$ )  $\delta$  ppm 20.47 ( $\text{C}(\text{O})\text{CH}_3$ ) 20.51 ( $2 \times \text{C}(\text{O})\text{CH}_3$ ) 20.58 ( $\text{C}(\text{O})\text{CH}_3$ ) 20.65 ( $\text{C}(\text{O})\text{CH}_3$ ) 20.72 ( $\text{C}(\text{O})\text{CH}_3$ ) 28.77 ( $\text{CH}_3(\text{Ar})$ ) 28.82 ( $\text{CH}_3(\text{Ar})$ ) 38.05 ( $\text{C}9(\text{Ar})$ ) 60.88 (C6) 61.58 (C6') 67.73 (C4') 71.53 (C2') 72.05 (C5') 71.99 (d,  $J_{\text{C}3-\text{F}2}$  19.1 Hz, C3) 72.79 (C3') 73.18 (C5) 75.84 (d,  $J_{\text{C}4-\text{F}2}$  6.8 Hz, C4) 89.86 (d,  $J_{\text{C}2-\text{F}2}$  193.5 Hz, C2) 100.27 (d,  $J_{\text{C}1-\text{F}2}$  23.7 Hz, C1) 100.71 (C1') 128.85 (C6(Ar)) 129.01, 130.07 (C8(Ar)) 132.34 (C4(Ar)) 132.56, 133.25, 140.69 (C6(Ar)) 140.88, 148.22, 149.47 (C2(Ar)) 153.15, 168.85 ( $\text{C}(\text{O})\text{CH}_3$ ) 169.25 ( $\text{C}(\text{O})\text{CH}_3$ ) 169.49 ( $\text{C}(\text{O})\text{CH}_3$ ) 169.87 ( $\text{C}(\text{O})\text{CH}_3$ ) 170.22 ( $\text{C}(\text{O})\text{CH}_3$ ) 170.46 ( $\text{C}(\text{O})\text{CH}_3$ ) 187.24 ( $\text{C}=\text{O}(\text{Ar})$ ).



9*H*-(1,3-Dichloro-9,9-dimethylacridin-7-on-2-yl) 2-deoxy-2-fluoro- $\beta$ -D-cellobioside  
(DDAO-2FCel) (**4**)

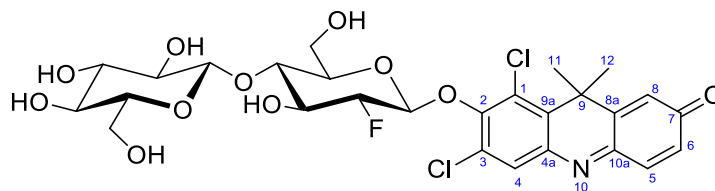

Compound **16** (40 mg, 0.46 mmol) was treated according to the general procedure for deacetylation. The crude product was recrystallized (MeOH) to give polyol **4** as a yellow powder (15 mg, 53%). **HRMS**: mass calculated for  $C_{27}H_{30}Cl_2FNNaO_{11}$ : 656.1078; found: 656.1072  $[M+Na]^+$ .  **$^1H$  NMR** (400 MHz,  $CD_3OD$ )  $\delta$  ppm 1.84 (s, 3 H,  $CH_{3(Ar)}$ ) 1.85 (s, 3 H,  $CH_{3(Ar)}$ ) 3.37 - 3.94 (m, 11 H, H3-H6 and H2'-H6') 4.47 (d,  $J_{H1'-H2'}$  7.7 Hz, 1 H, H1') 4.48 (ddd,  $J_{H2-F2}$  51.3  $J_{H2-H3}$  8.8  $J_{H2-H1}$  7.6 Hz, 1 H, H2) 5.45 (dd,  $J_{H1-H2}$  7.6  $J_{H1-F2}$  2.2 Hz, 1 H, H1) 6.69 (dd,  $J_{H6(Ar)-H5(Ar)}$  9.7  $J_{H6(Ar)-H8(Ar)}$  1.8 Hz, 1 H, H6<sub>(Ar)</sub>) 6.81 (d,  $J_{H8(Ar)-H6(Ar)}$  1.8 Hz, 1 H, H8<sub>(Ar)</sub>) 7.45 (d,  $J_{H5(Ar)-H6(Ar)}$  9.7 Hz, 1 H, H5<sub>(Ar)</sub>) 7.80 (s, 1 H, H4<sub>(Ar)</sub>)  **$^{19}F$  NMR** (282 MHz,  $CD_3OD$ )  $\delta$  ppm -198.74 (ddd,  $J_{F2-H2}$  51.3  $J_{F2-H3}$  13.19  $J_{F2-H1}$  2.2 Hz, F2)  **$^{13}C$  NMR** (101 MHz,  $CD_3OD$ )  $\delta$  ppm 29.08 ( $CH_{3(Ar)}$ ) 29.19 ( $CH_{3(Ar)}$ ) 39.60 ( $C9_{(Ar)}$ ) 55.04, 61.69, 62.61, 71.55, 74.85 (d,  $J_{C4-F2}$  17.5 Hz, C4) 75.03, 77.38, 78.14 (d,  $J_{C3-F2}$  30.5 Hz, C3) 79.96, 93.86 (d,  $J_{C2-F2}$  188.9 Hz, C2) 102.33 (d,  $J_{C1-F2}$  22.9 Hz, C1) 104.66 (C1') 129.65, 130.00 ( $C8_{(Ar)}$ ) 131.59, 133.31 ( $C6_{(Ar)}$ ) 133.63 ( $C4_{(Ar)}$ ) 134.98, 141.92, 142.48 ( $C5_{(Ar)}$ ) 150.42, 151.70, 154.49, 189.12 ( $C=O_{(Ar)}$ ).

## Kinetic analyses

Enzyme kinetic experiments were performed as described below using the conditions outlined in Table S1. Extinction coefficients for all aglycones, except those for DDAO, were obtained from Kempton and Withers.<sup>10</sup> All experiments were performed in buffer with DMSO content (v/v) not exceeding 5%.

Table S1: Reaction conditions used in enzymatic assays.

| enzyme | substrate for indirect inactivation assays* | buffer                                          | pH  | T (°C) |
|--------|---------------------------------------------|-------------------------------------------------|-----|--------|
| Abg    | $\beta$ GlcPNP                              | 50 mM NaP <sub>i</sub>                          | 6.8 | 37     |
| GCCase | $\beta$ GlcDNP                              | 50 mM citrate                                   | 5   | 30     |
| LacZ   | $\beta$ GalONP                              | 50 mM NaP <sub>i</sub> , 1 mM MgCl <sub>2</sub> | 6.8 | 37     |
| Bhx    | $\beta$ XylPNP                              | 50 mM NaP <sub>i</sub>                          | 6.8 | 37     |
| EG-I   | --                                          | 50 mM citrate                                   | 5   | 30     |
| Cex    | --                                          | 50 mM NaP <sub>i</sub>                          | 6.8 | 37     |

\*  $\beta$ GlcPNP = 4-nitrophenyl  $\beta$ -D-glucopyranoside,  $\beta$ GlcDNP = 2,4-dinitrophenyl  $\beta$ -D-glucopyranoside,  $\beta$ GalONP = 2-nitrophenyl  $\beta$ -D-galactopyranoside,  $\beta$ XylPNP = 4-nitrophenyl  $\beta$ -D-xylopyranoside

### General procedure for indirect inactivation assays

Varying concentrations of the inactivator compound were incubated with enzyme in the buffer and at the temperature listed in Table S1. At appropriate time-points, aliquots of this enzyme-inactivator reaction mixture were removed and diluted into a cuvette containing the appropriate substrate at a high concentration ( $7-15 \times K_m$ ) that had been pre-incubated under the same buffer and temperature conditions (Table S1), such that the final volume was 200  $\mu$ l. The residual initial rate of substrate hydrolysis for each time-point was determined by monitoring the change in absorbance of the sample at an appropriate wavelength with respect to time. Each time point was plotted against its rate and the data set then fit to a pseudo-first order decay equation to obtain the rate constant of inactivation ( $k_{obs}$ ) at that inactivator concentration. The resulting  $k_{obs}$  values were plotted against the corresponding inactivator concentration and fit to Equations 1 or 2 to obtain the kinetic parameters  $k_i$  and  $K_i$ .

$$\text{Equation 1: } k_{obs} = \frac{k_i[I-X]}{K_i + [I-X]}$$

For reactions at inactivator concentrations well below the  $K_i$  value, a  $k_i/K_i$  was obtained by fit to:

$$\text{Equation 2: } k_{obs} = \frac{k_i[I-X]}{K_i}$$

### General procedure for direct inactivation assays

Varying concentrations of the inactivator were pre-incubated in the buffer and at the temperature listed in Table S1. The inactivation reaction was initiated by the addition of enzyme. DDAO release was monitored continuously by observing the solutions' absorbance at 600 nm. The inactivation parameters ( $k_i$  and  $K_i$ ) were obtained either by fitting the initial rates of inactivation, or the observed rate constants of inactivation ( $k_{obs}$ ), to a Michaelis-Menten type equation (Equation 1). For the latter, the  $k_{obs}$  values were obtained by fitting the derivative of the absorbance vs. time plots to an exponential decay curve using GraFit 7.0.

### General procedure for direct inactivation assays by stopped flow

Experiments were performed on an Applied Photophysics SX20 stopped flow machine coupled with a water bath. Two syringes were filled with 800  $\mu$ l of 0.64  $\mu$ M Abg or inactivator **1** (2.58  $\mu$ M to 137  $\mu$ M) and incubated at 37°C for 5 minutes. DDAO release was monitored by absorbance at 600 nm, and the resulting curves were averaged and fit with the accompanying software (Pro-Data SX Viewer) using an equation for a single exponential to obtain the observed rate constant of inactivation ( $k_{obs}$ ). Inactivation kinetic parameters  $k_i$  and  $K_i$  were obtained by fitting a plot of  $k_{obs}$  vs. inactivator concentration to Equation 1.

## **pK<sub>a</sub> Determinations**

pK<sub>a</sub> determinations for DDAO were performed in buffer containing 50 mM citrate, 50 mM sodium phosphate and 50 mM Tris. Buffer pH was adjusted using NaOH or HCl. Solutions (1000  $\mu$ l) of DDAO (2  $\mu$ M) were incubated at 37°C for 5 min. The fluorescence response at 600 V was recorded and plotted as a function of pH. This data set was fit to a pH titration curve using GraFit 5.0.

## **Extinction coefficient determinations**

DDAO (11–15 mg) was dissolved in DMSO (1.0 ml), diluted 100-fold into DMSO, then further diluted 20-fold into 50 mM sodium phosphate buffer (pH 6.8) to give a final concentration of 17–24  $\mu$ M DDAO. Further dilutions into buffer were made (10, 20, 50 and 100-fold) and, after equilibration at 37°C for 5 min, their absorbance at 600 nm were measured. These values were plotted as a function of DDAO concentration to give a good linear correlation ( $R^2 > 0.97$  in all cases). The final extinction coefficient value was determined using Beer's law and is an average of seven independent replicates.

## Active site titrations of Abg

Solutions of Abg in sodium phosphate buffer at pH 6.8 were equilibrated at 37°C for 5 min. A baseline absorbance (600 nm) or fluorescence ( $\lambda_{\text{ex}} = 600 \text{ nm}$ ,  $\lambda_{\text{em}} = 656 \text{ nm}$ ) was measured. Absorbance at 700 nm was also measured as an internal control. Active site titrant DDAO-2FGlc **1** was added to a final concentration of 70  $\mu\text{M}$ . The change in absorbance or fluorescence response was monitored. The final change in absorbance was calculated as follows:

$$(A_{600} - A_{700})_{\text{final}} - (A_{600} - A_{700})_{\text{initial}}$$

The change in DDAO concentration was then calculated by Beer's Law ( $A = \epsilon bc$ ) where  $\epsilon = 32100 \text{ M}^{-1} \text{ cm}^{-1}$ ,  $b = 1 \text{ cm}$ .

DDAO release by fluorescence was quantified using an appropriate calibration curve for DDAO in this buffer system.

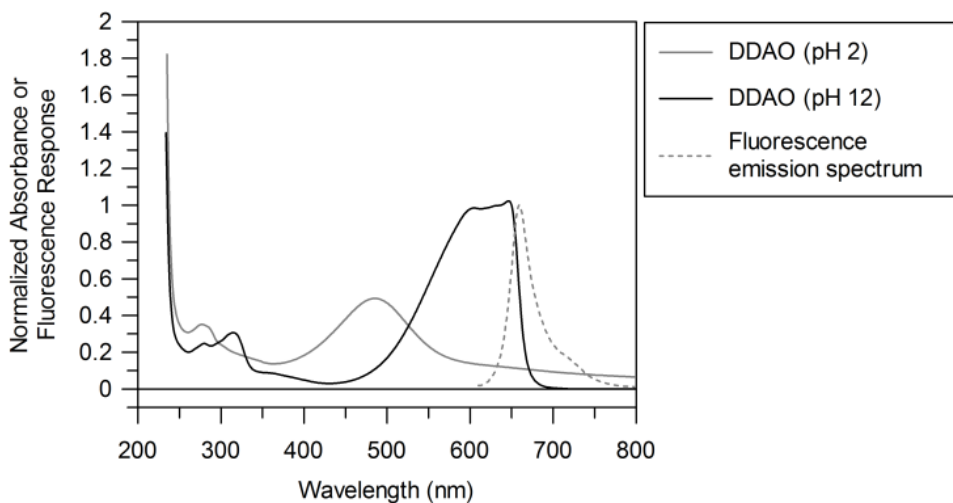

Figure S1: Absorbance spectra of protonated (pH 2) and deprotonated (pH 12) DDAO and a fluorescence emission spectrum ( $\lambda_{\text{ex}} = 600 \text{ nm}$ ).

## References

- [1] C. Mayer, D. L. Zechel, S. P. Reid, R. A. J. Warren and S. G. Withers, *FEBS Lett.* **2000**, *466*, 40.
- [2] E. D. Goddard-Borger, B. Fiege, E. M. Kwan and S. G. Withers, *ChemBioChem*, **2011**, *12*, 1703.
- [3] A. M. MacLeod, T. Lindhorst, S. G. Withers and R. A. J. Warren, *Biochemistry*, **1994**, *33*, 6371.
- [4] M. D. Burkart, Z. Zhang, S.-C. Hung and C.-H. Wong, *J. Am. Chem. Soc.* **1997**, *119*, 11743.
- [5] C. Bucher and R. Gilmour, *Angew. Chem. Int. Ed.* **2010**, *49*, 8724.
- [6] E. Durantie, C. Bucher and R. Gilmour, *Chem. Eur. J.* **2012**, *18*, 8208.
- [7] L. Ziser, I. Setyawati and S. G. Withers, *Carbohydr. Res.* **1995**, *274*, 137.
- [8] T. Kanda, C. F. Brewer, G. Okada and E. J. Hehre, *Biochemistry*, **1986**, *25*, 1159.
- [9] J. D. McCarter, M. J. Adam, C. Braun, M. Namchuk, D. Tull and S. G. Withers, *Carbohydr. Res.*, **1993**, *249*, 77.
- [10] J. B. Kempton and S. G. Withers, *Biochemistry*, **1992**, *31*, 9961.

# DDAO-2FGlc

1H

|                               |                      |                          |                  |                                                 |                      |                       |       |
|-------------------------------|----------------------|--------------------------|------------------|-------------------------------------------------|----------------------|-----------------------|-------|
| <b>Acquisition Time (sec)</b> | 2.9295               | <b>Comment</b>           | 1H               | <b>Date</b>                                     | 13 Dec 2010 21:07:12 |                       |       |
| <b>Date Stamp</b>             | 13 Dec 2010 21:07:12 |                          | <b>File Name</b> | C:\Users\Tanya\Desktop\101213-Y-MeOD\1H_000001r |                      |                       |       |
| <b>Frequency (MHz)</b>        | 400.19               | <b>Nucleus</b>           | 1H               | <b>Number of Transients</b>                     | 32                   | <b>Origin</b>         | spect |
| <b>Original Points Count</b>  | 16384                | <b>Owner</b>             | root             | <b>Points Count</b>                             | 32768                | <b>Pulse Sequence</b> | zg30  |
| <b>Receiver Gain</b>          | 256.00               | <b>SW(cyclical) (Hz)</b> | 5592.84          | <b>Solvent</b>                                  | CHLOROFORM-d         |                       |       |
| <b>Spectrum Offset (Hz)</b>   | 2589.4526            | <b>Sweep Width (Hz)</b>  | 5592.67          | <b>Temperature (degree C)</b>                   | 23.760               |                       |       |

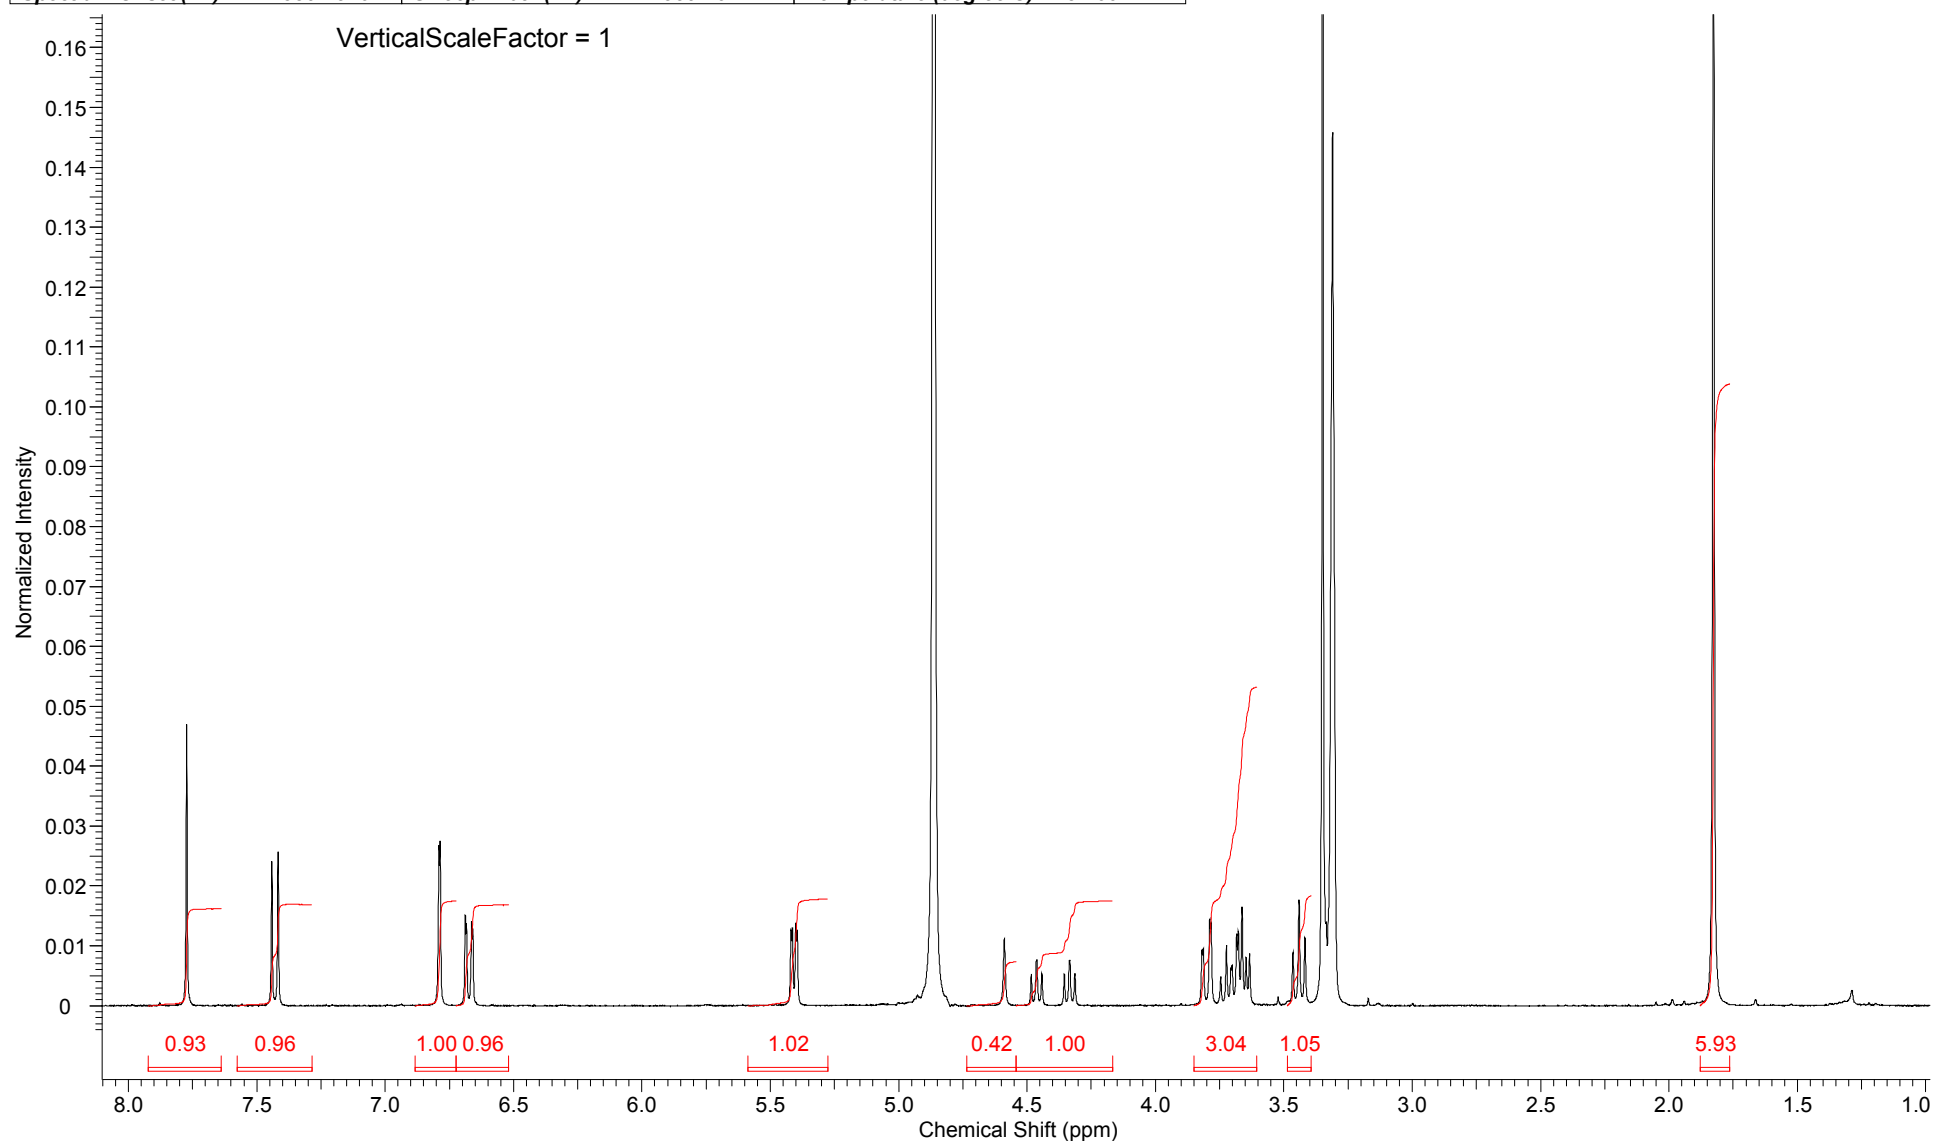

# DDAO-2FGlc

13C

|                               |                      |                          |                                                 |                               |                      |                       |        |
|-------------------------------|----------------------|--------------------------|-------------------------------------------------|-------------------------------|----------------------|-----------------------|--------|
| <b>Acquisition Time (sec)</b> | 0.6521               | <b>Comment</b>           | 13C                                             | <b>Date</b>                   | 14 Dec 2010 09:27:28 |                       |        |
| <b>Date Stamp</b>             | 14 Dec 2010 09:27:28 | <b>File Name</b>         | C:\Users\Tanya\Desktop\101213-Y-MeOD\5C_000001r |                               |                      |                       |        |
| <b>Frequency (MHz)</b>        | 100.63               | <b>Nucleus</b>           | 13C                                             | <b>Number of Transients</b>   | 8192                 | <b>Origin</b>         | spect  |
| <b>Original Points Count</b>  | 16384                | <b>Owner</b>             | psm                                             | <b>Points Count</b>           | 32768                | <b>Pulse Sequence</b> | zgpg30 |
| <b>Receiver Gain</b>          | 912.30               | <b>SW(cyclical) (Hz)</b> | 25125.63                                        | <b>Solvent</b>                | CHLOROFORM-d         |                       |        |
| <b>Spectrum Offset (Hz)</b>   | 10218.5752           | <b>Sweep Width (Hz)</b>  | 25124.86                                        | <b>Temperature (degree C)</b> | 24.160               |                       |        |

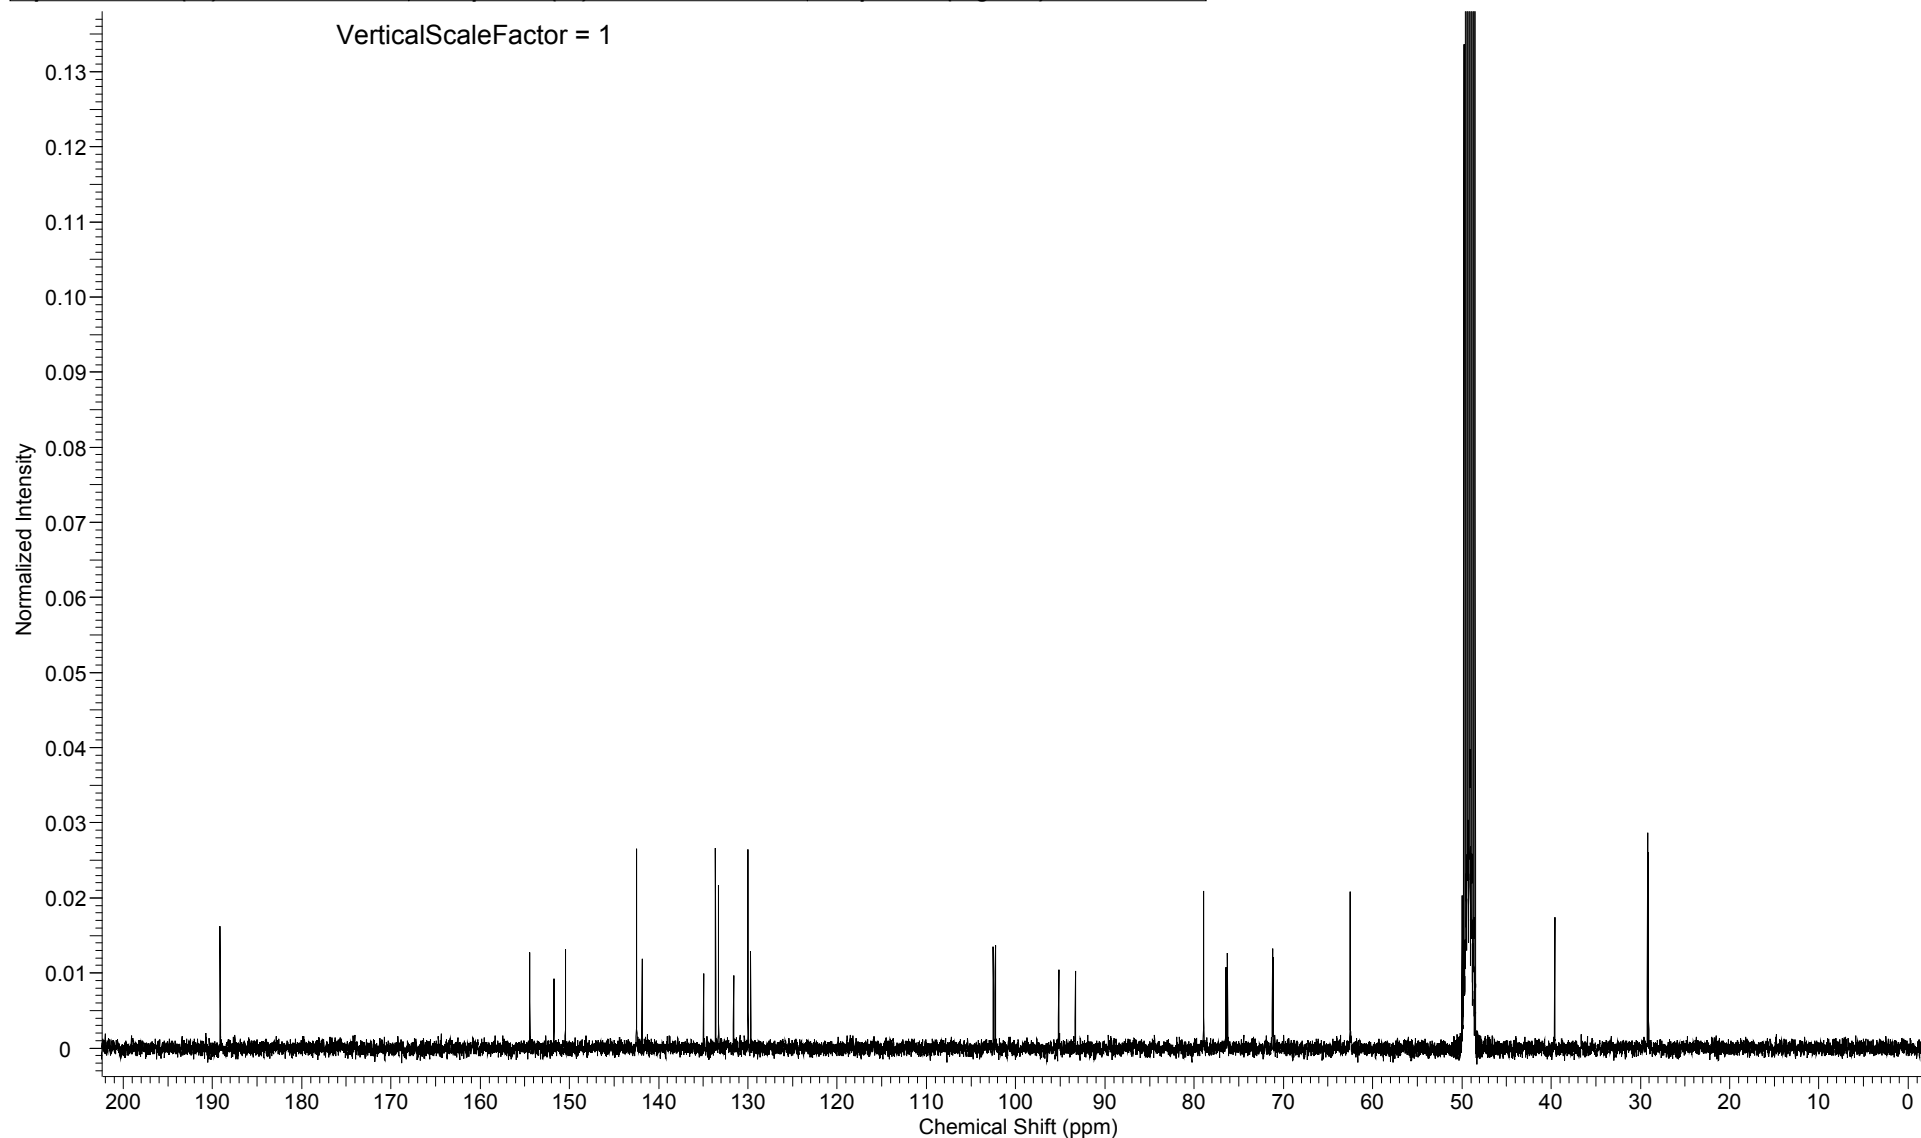

## DDAO-2FGal

JOB NO: 1H spectrum ref. to CDCl3 at 7.27 ppm

|                               |                      |                               |                                                  |                             |                      |
|-------------------------------|----------------------|-------------------------------|--------------------------------------------------|-----------------------------|----------------------|
| <b>Acquisition Time (sec)</b> | 2.1998               | <b>Comment</b>                | JOB NO: 1H spectrum ref. to CDCl3 at 7.27 ppm    | <b>Date</b>                 | 24 Aug 2011 00:12:48 |
| <b>Date Stamp</b>             | 24 Aug 2011 00:12:48 | <b>File Name</b>              | C:\Users\Tanya\Documents\NMR\1108232FGal_002001r |                             |                      |
| <b>Frequency (MHz)</b>        | 400.13               | <b>Nucleus</b>                | 1H                                               | <b>Number of Transients</b> | 15                   |
| <b>Original Points Count</b>  | 10977                | <b>Owner</b>                  | root                                             | <b>Points Count</b>         | 32768                |
| <b>Receiver Gain</b>          | 812.70               | <b>SW(cyclical) (Hz)</b>      | 4990.02                                          | <b>Solvent</b>              | METHANOL-d4          |
| <b>Sweep Width (Hz)</b>       | 4989.87              | <b>Temperature (degree C)</b> | 25.060                                           | <b>Spectrum Offset (Hz)</b> | 2395.7190            |

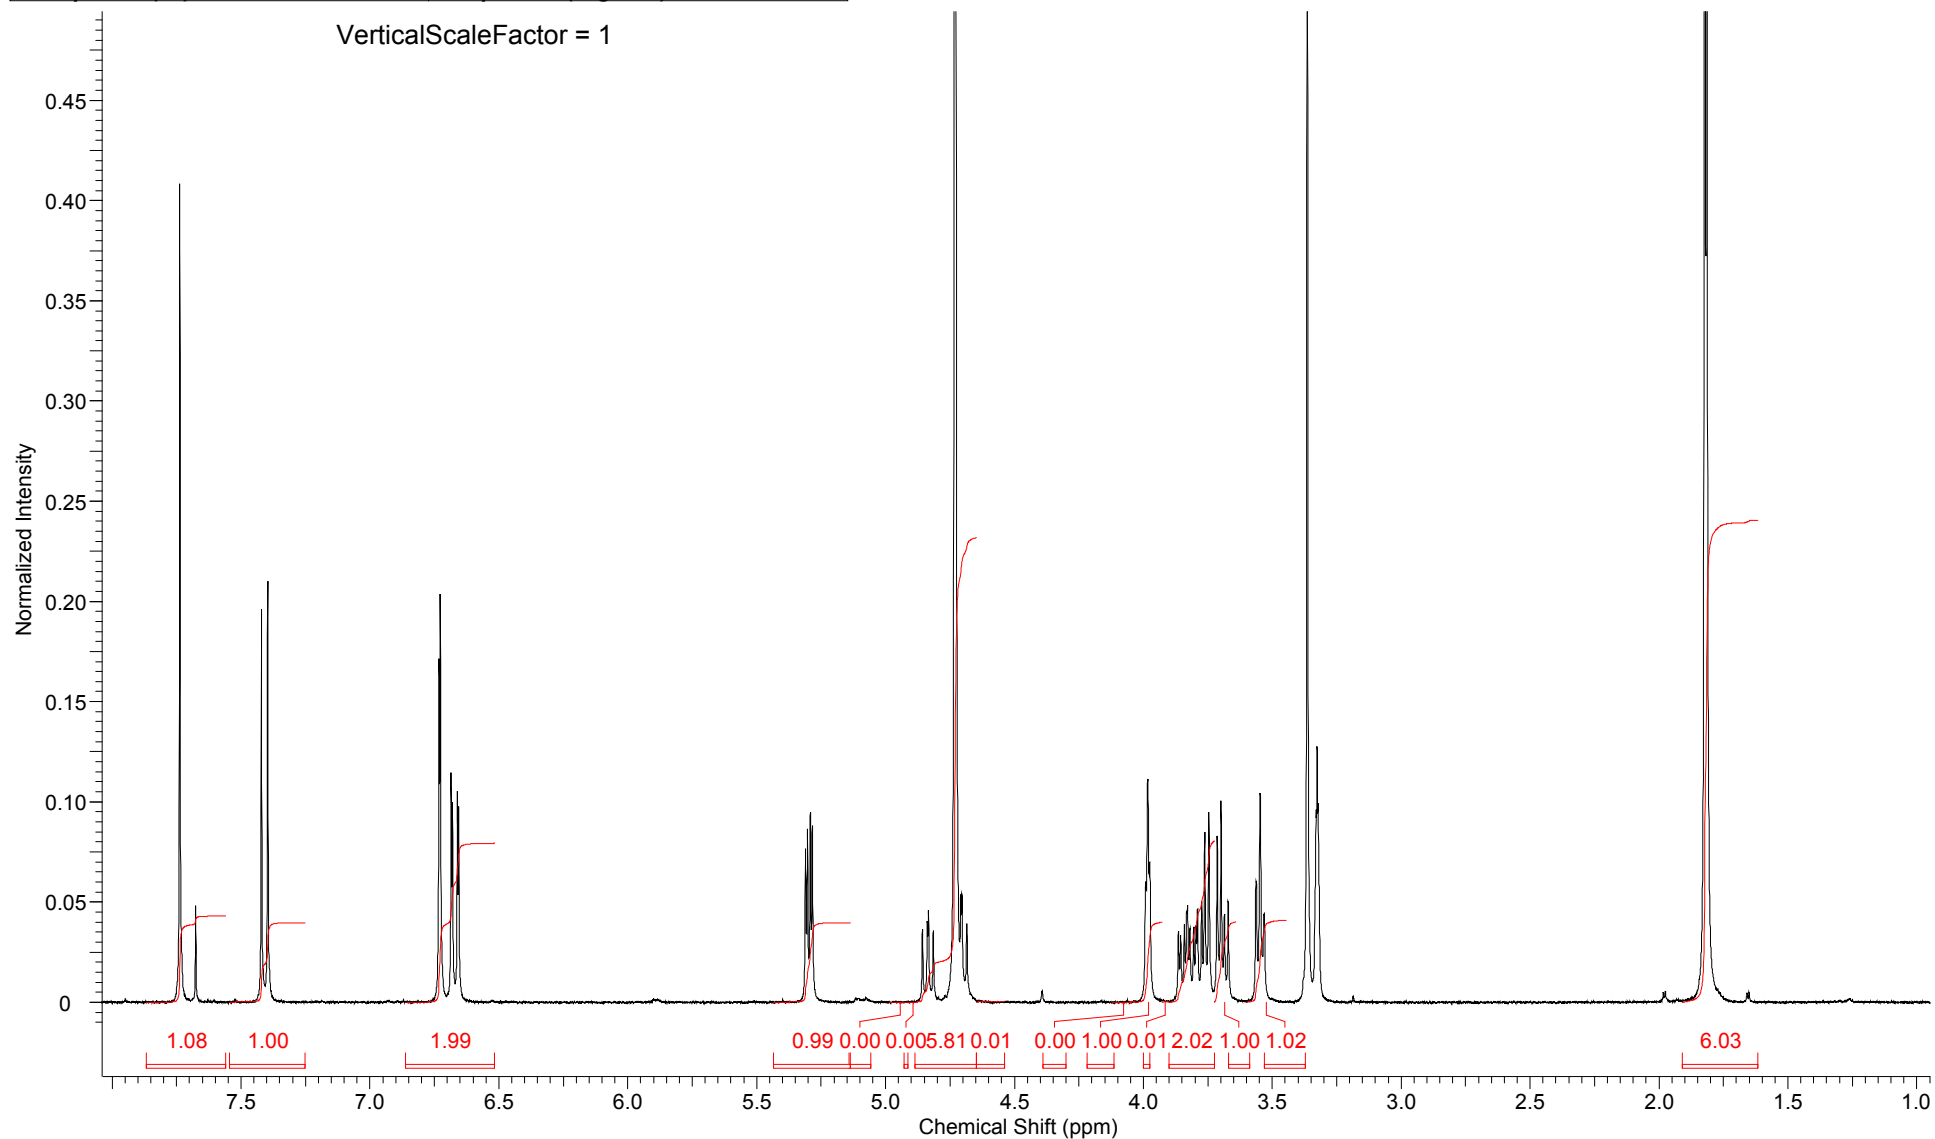



## DDAO-2FGal

13C

|                               |                      |                          |                  |                                                      |                      |                       |        |
|-------------------------------|----------------------|--------------------------|------------------|------------------------------------------------------|----------------------|-----------------------|--------|
| <b>Acquisition Time (sec)</b> | 0.6521               | <b>Comment</b>           | 13C              | <b>Date</b>                                          | 24 Aug 2011 10:10:08 |                       |        |
| <b>Date Stamp</b>             | 24 Aug 2011 10:10:08 |                          | <b>File Name</b> | C:\Users\Tanya\Documents\NMR\1108242FGal\2 C_000001r |                      |                       |        |
| <b>Frequency (MHz)</b>        | 100.63               | <b>Nucleus</b>           | 13C              | <b>Number of Transients</b>                          | 728                  | <b>Origin</b>         | spect  |
| <b>Original Points Count</b>  | 16384                | <b>Owner</b>             | root             | <b>Points Count</b>                                  | 32768                | <b>Pulse Sequence</b> | zpgg30 |
| <b>Receiver Gain</b>          | 812.70               | <b>SW(cyclical) (Hz)</b> | 25125.63         | <b>Solvent</b>                                       | CHLOROFORM-d         |                       |        |
| <b>Spectrum Offset (Hz)</b>   | 10164.9014           | <b>Sweep Width (Hz)</b>  | 25124.86         | <b>Temperature (degree C)</b>                        | 24.560               |                       |        |

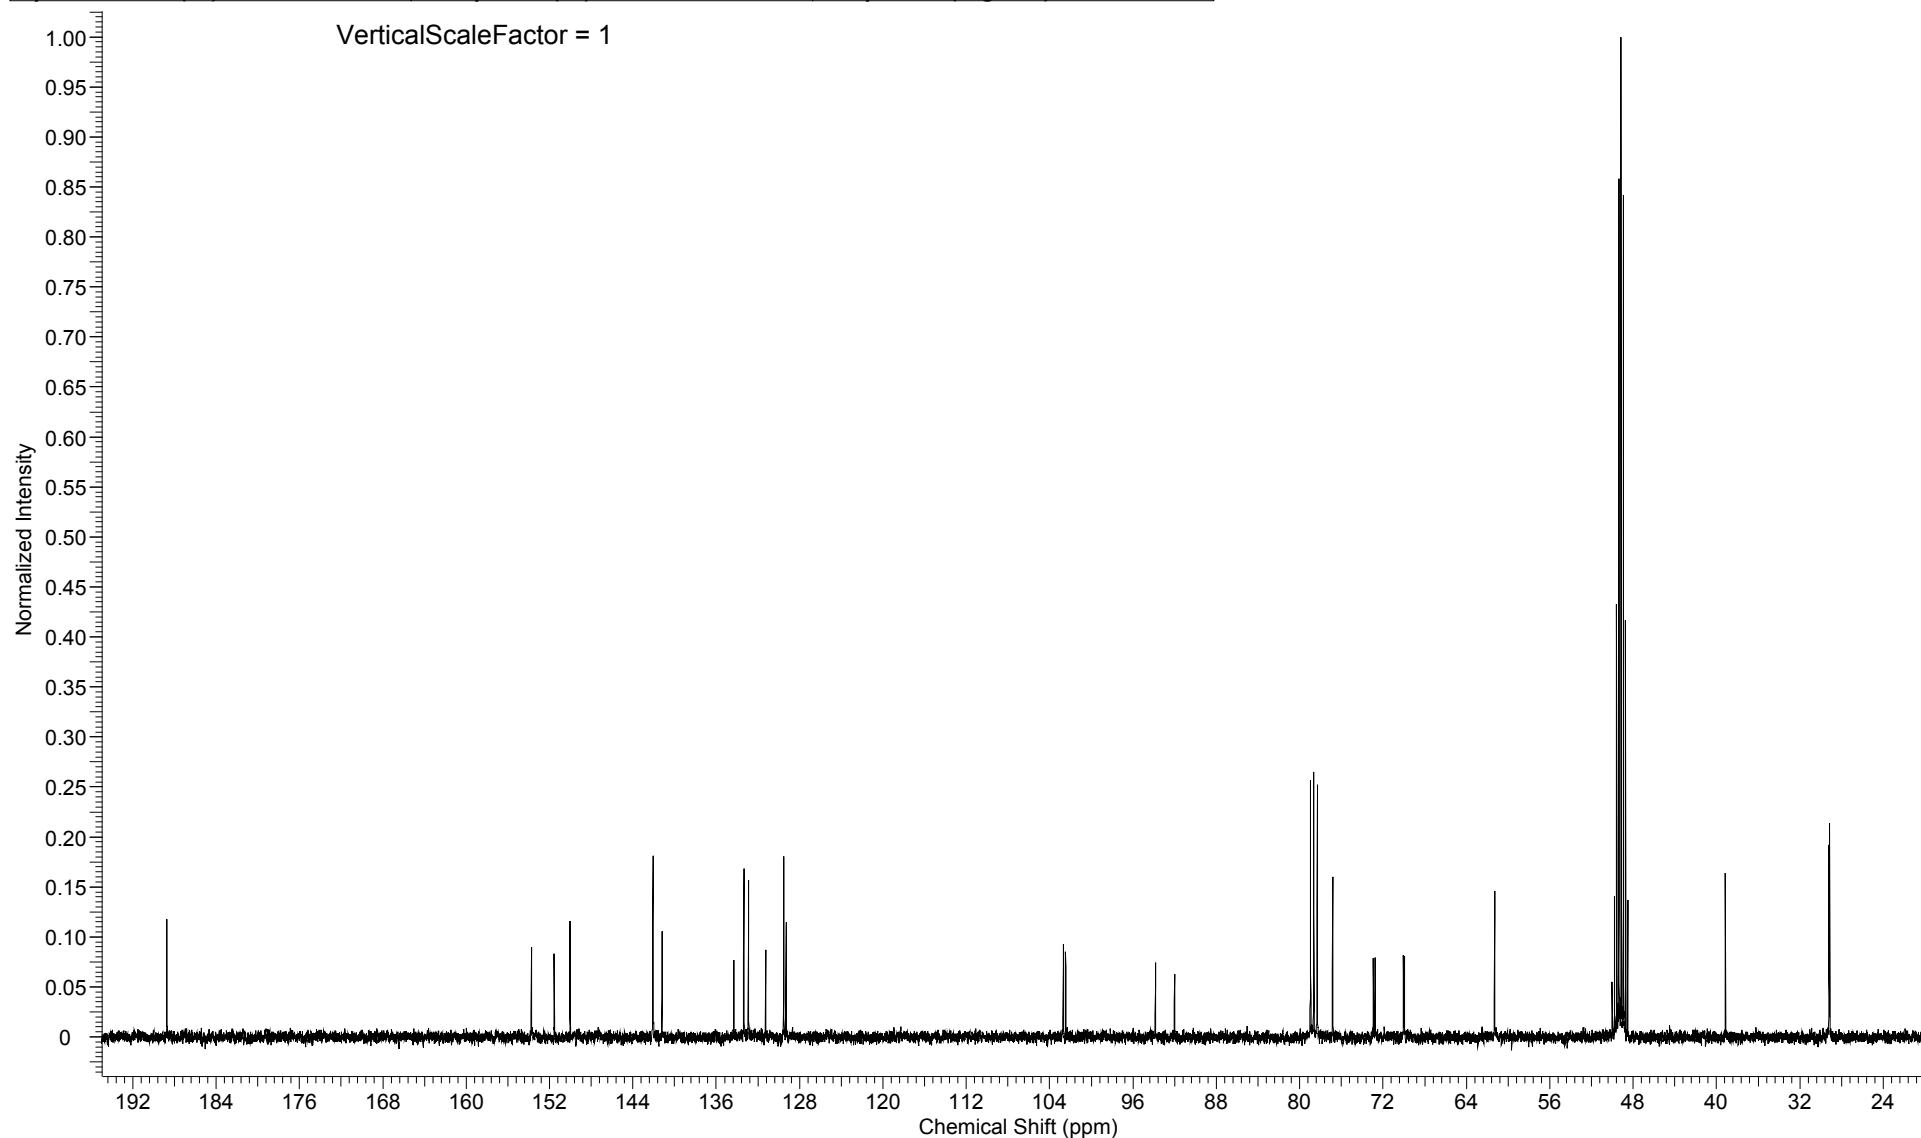

# DDAO-2FXyl

JOB NO: 1H spectrum ref. to CDCl3 at 7.27 ppm

|                               |                      |                          |                                                  |                               |              |                       |       |
|-------------------------------|----------------------|--------------------------|--------------------------------------------------|-------------------------------|--------------|-----------------------|-------|
| <b>Acquisition Time (sec)</b> | 2.1998               | <b>Comment</b>           | JOB NO: 1H spectrum ref. to CDCl3 at 7.27 ppm    |                               | <b>Date</b>  | 29 Jun 2011 04:30:56  |       |
| <b>Date Stamp</b>             | 29 Jun 2011 04:30:56 | <b>File Name</b>         | C:\USERS\TANYA\DOCUMENTS\NMR\1106282FXyl_001001r |                               |              |                       |       |
| <b>Frequency (MHz)</b>        | 400.13               | <b>Nucleus</b>           | 1H                                               | <b>Number of Transients</b>   | 256          | <b>Origin</b>         | av400 |
| <b>Original Points Count</b>  | 10977                | <b>Owner</b>             | root                                             | <b>Points Count</b>           | 32768        | <b>Pulse Sequence</b> | zg30  |
| <b>Receiver Gain</b>          | 812.70               | <b>SW(cyclical) (Hz)</b> | 4990.02                                          | <b>Solvent</b>                | CHLOROFORM-d |                       |       |
| <b>Spectrum Offset (Hz)</b>   | 2395.7190            | <b>Sweep Width (Hz)</b>  | 4989.87                                          | <b>Temperature (degree C)</b> | 25.160       |                       |       |

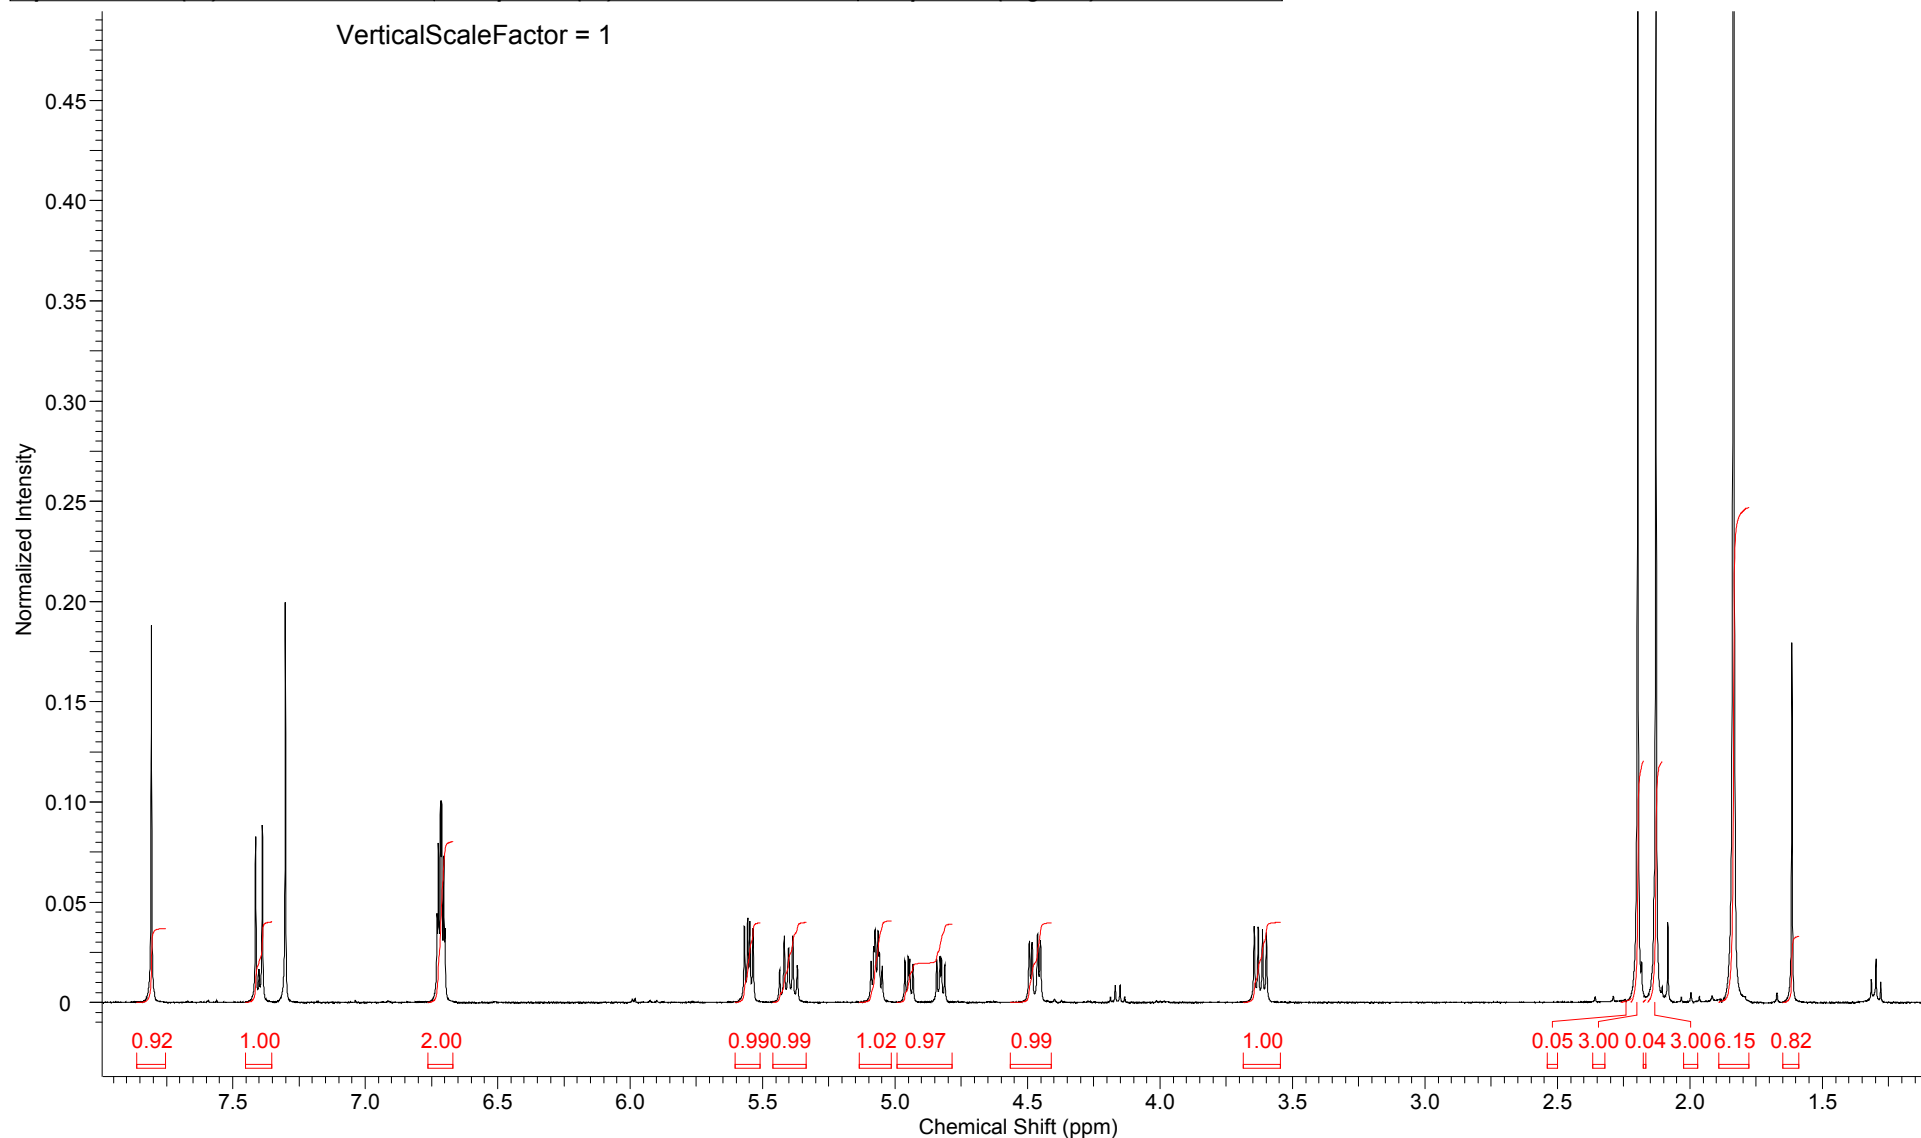

# DDAO-2FXyl

13C

|                               |                      |                          |                                             |                               |                      |                       |        |
|-------------------------------|----------------------|--------------------------|---------------------------------------------|-------------------------------|----------------------|-----------------------|--------|
| <b>Acquisition Time (sec)</b> | 0.6521               | <b>Comment</b>           | 13C                                         | <b>Date</b>                   | 05 Jul 2011 11:14:08 |                       |        |
| <b>Date Stamp</b>             | 05 Jul 2011 11:14:08 | <b>File Name</b>         | C:\USERS\TANYA\DOCUMENTS\NMR\110705_001001r |                               |                      |                       |        |
| <b>Frequency (MHz)</b>        | 100.63               | <b>Nucleus</b>           | 13C                                         | <b>Number of Transients</b>   | 770                  | <b>Origin</b>         | spect  |
| <b>Original Points Count</b>  | 16384                | <b>Owner</b>             | root                                        | <b>Points Count</b>           | 32768                | <b>Pulse Sequence</b> | zgpg30 |
| <b>Receiver Gain</b>          | 1024.00              | <b>SW(cyclical) (Hz)</b> | 25125.63                                    | <b>Solvent</b>                | CHLOROFORM-d         |                       |        |
| <b>Spectrum Offset (Hz)</b>   | 10074.8779           | <b>Sweep Width (Hz)</b>  | 25124.86                                    | <b>Temperature (degree C)</b> | 25.360               |                       |        |

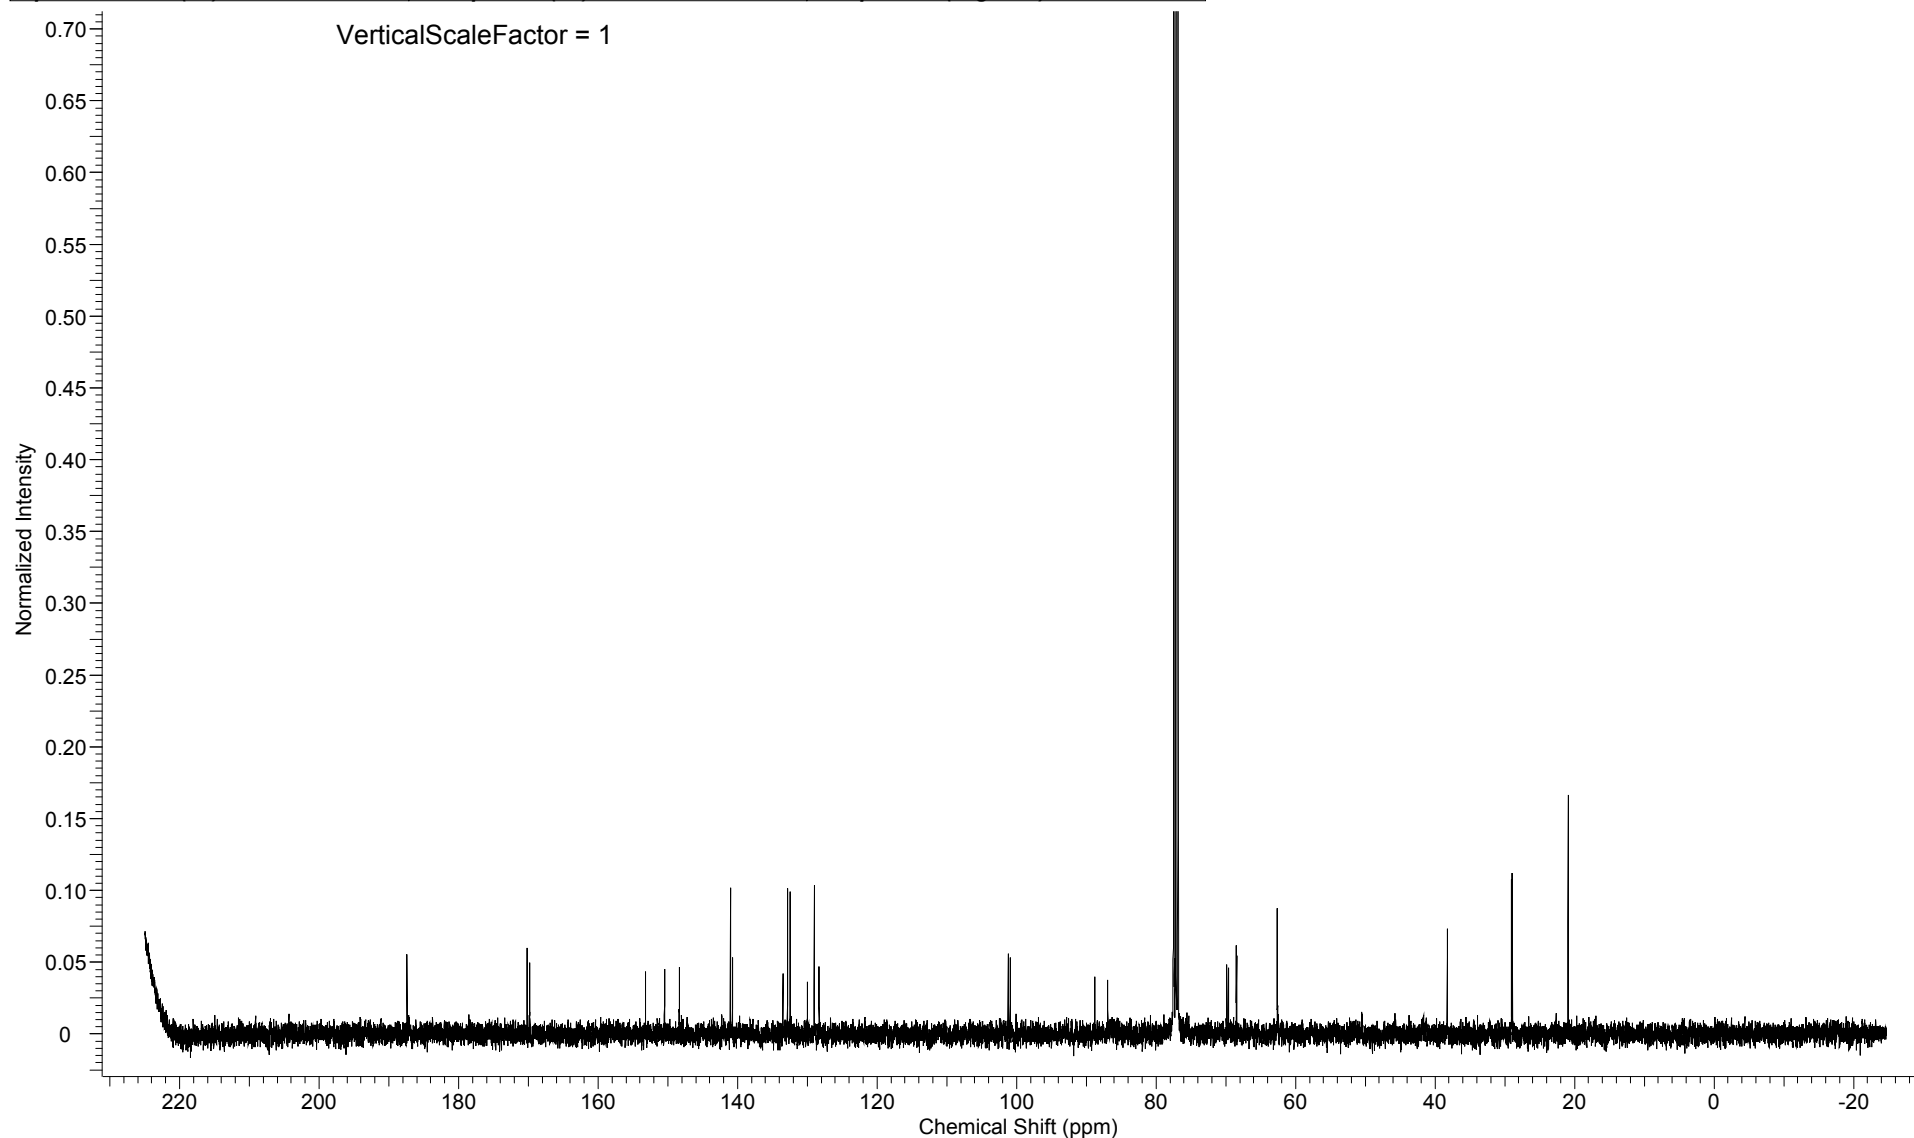

## DDAO-2FCeI

JOB NO: 1H spectrum ref. to CDCl3 at 7.27 ppm

|                               |                                                                                     |                               |                                               |                       |                             |                              |                      |          |
|-------------------------------|-------------------------------------------------------------------------------------|-------------------------------|-----------------------------------------------|-----------------------|-----------------------------|------------------------------|----------------------|----------|
| <b>Acquisition Time (sec)</b> | 2.1998                                                                              | <b>Comment</b>                | JOB NO: 1H spectrum ref. to CDCl3 at 7.27 ppm |                       | <b>Date</b>                 | 23 Mar 2012 15:19:44         |                      |          |
| <b>Date Stamp</b>             | 23 Mar 2012 15:19:44                                                                |                               |                                               |                       |                             |                              |                      |          |
| <b>File Name</b>              | C:\Users\Tanya\Documents\Withers Group\NMR\120323 2FCDY 400inv\1H regular\data\1\1r |                               |                                               |                       | <b>Frequency (MHz)</b>      | 400.13                       |                      |          |
| <b>Nucleus</b>                | 1H                                                                                  | <b>Number of Transients</b>   | 49                                            | <b>Origin</b>         | av400                       | <b>Original Points Count</b> | 10977                |          |
| <b>Owner</b>                  | psm                                                                                 | <b>Points Count</b>           | 32768                                         | <b>Pulse Sequence</b> | zg30                        | <b>Receiver Gain</b>         | 287.40               |          |
| <b>SW(cyclical) (Hz)</b>      | 4990.02                                                                             | <b>Solvent</b>                | METHANOL-d4                                   |                       | <b>Spectrum Offset (Hz)</b> | 2389.5759                    | <b>Spectrum Type</b> | STANDARD |
| <b>Sweep Width (Hz)</b>       | 4989.87                                                                             | <b>Temperature (degree C)</b> | 25.060                                        |                       |                             |                              |                      |          |

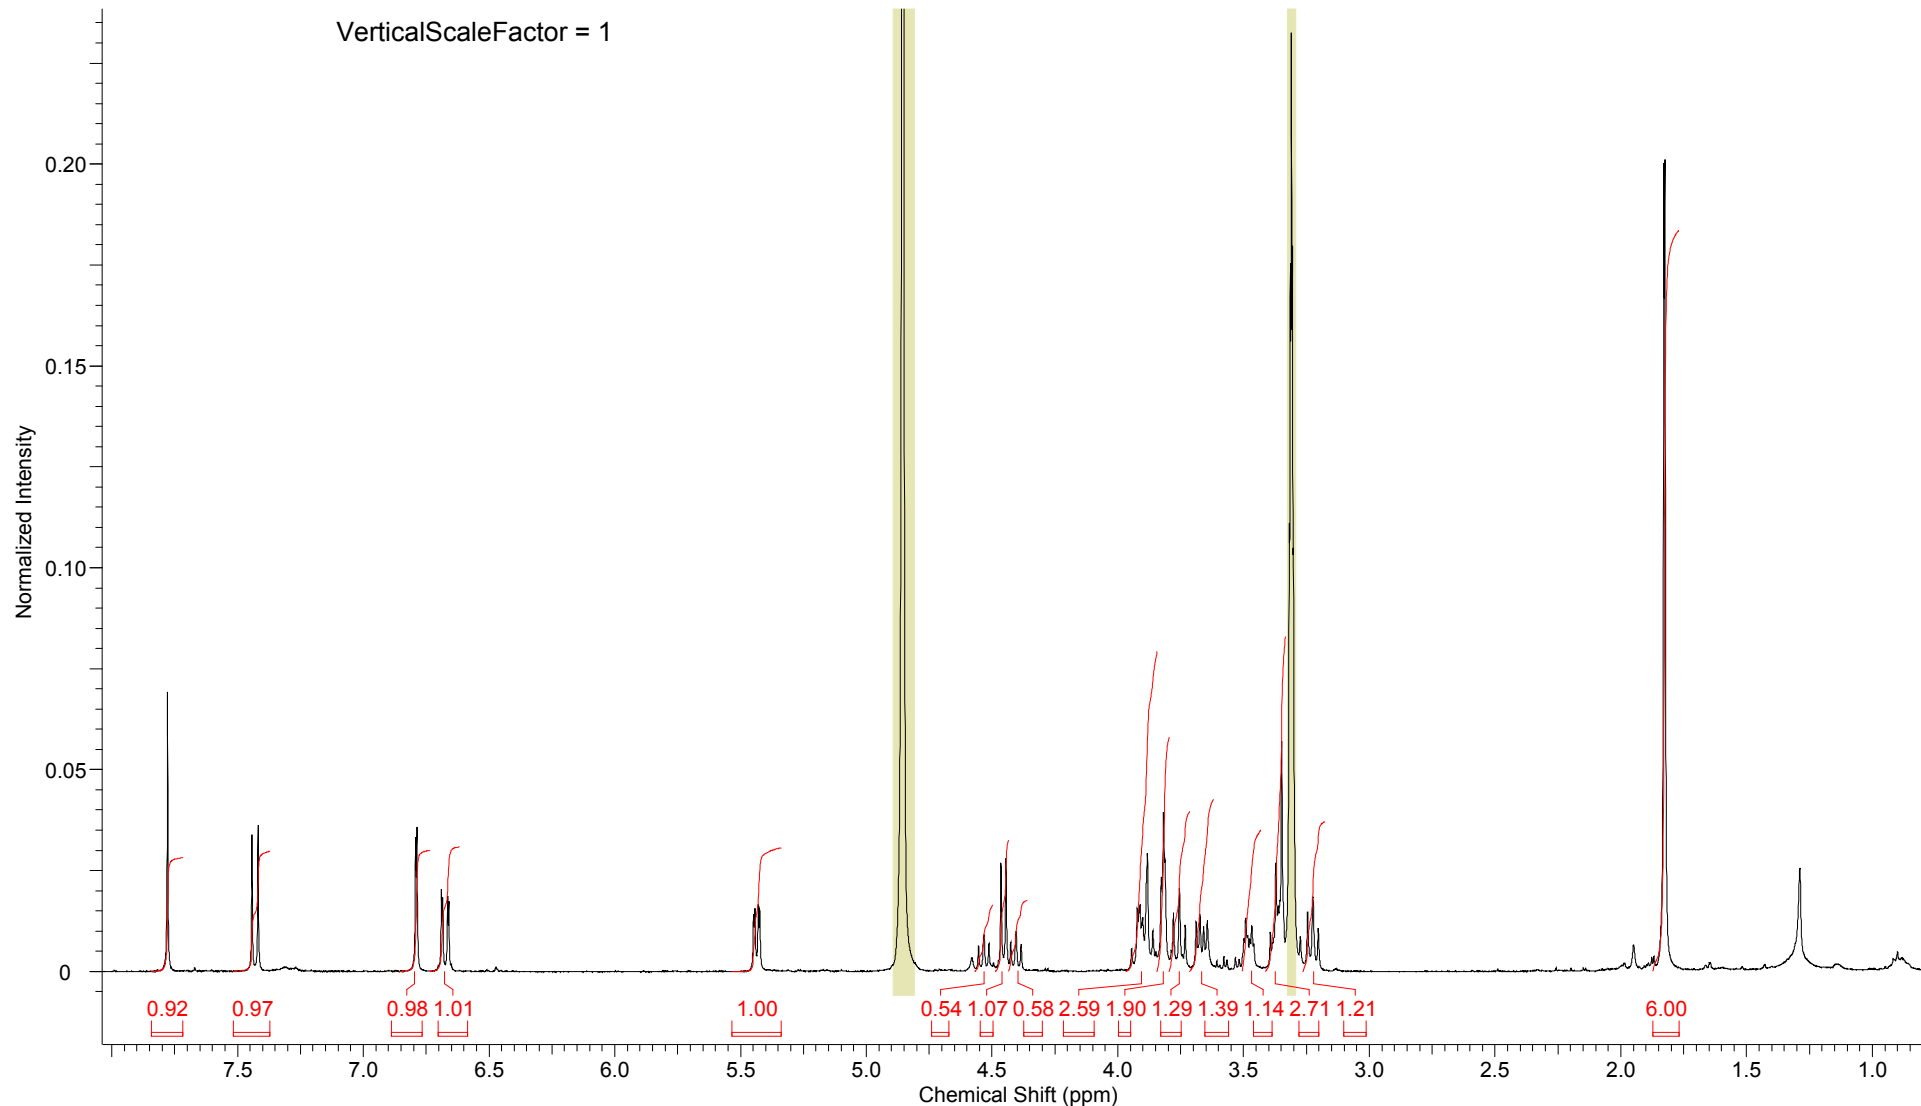

# DDAO-2FCeI

JOB NO: 13C spectrum ref to CDCl3 at 77.23 ppm

|                               |                      |                          |                                                                       |                             |              |                               |                      |
|-------------------------------|----------------------|--------------------------|-----------------------------------------------------------------------|-----------------------------|--------------|-------------------------------|----------------------|
| <b>Acquisition Time (sec)</b> | 0.6537               | <b>Comment</b>           | JOB NO: 13C spectrum ref to CDCl3 at 77.23 ppm                        |                             |              | <b>Date</b>                   | 28 Mar 2012 10:06:08 |
| <b>Date Stamp</b>             | 28 Mar 2012 10:06:08 | <b>File Name</b>         | C:\Users\Tanya\Documents\Withers Group\NMR\120327_2FCDY_2\5\data\1\1r |                             |              |                               |                      |
| <b>Frequency (MHz)</b>        | 100.61               | <b>Nucleus</b>           | 13C                                                                   | <b>Number of Transients</b> | 9835         | <b>Origin</b>                 | av400                |
| <b>Original Points Count</b>  | 16384                | <b>Owner</b>             | psm                                                                   | <b>Points Count</b>         | 32768        | <b>Pulse Sequence</b>         | zgpg30               |
| <b>Receiver Gain</b>          | 14596.50             | <b>SW(cyclical) (Hz)</b> | 25062.66                                                              | <b>Solvent</b>              | CHLOROFORM-d |                               |                      |
| <b>Spectrum Offset (Hz)</b>   | 10115.8955           | <b>Spectrum Type</b>     | STANDARD                                                              | <b>Sweep Width (Hz)</b>     | 25061.89     | <b>Temperature (degree C)</b> | 25.060               |

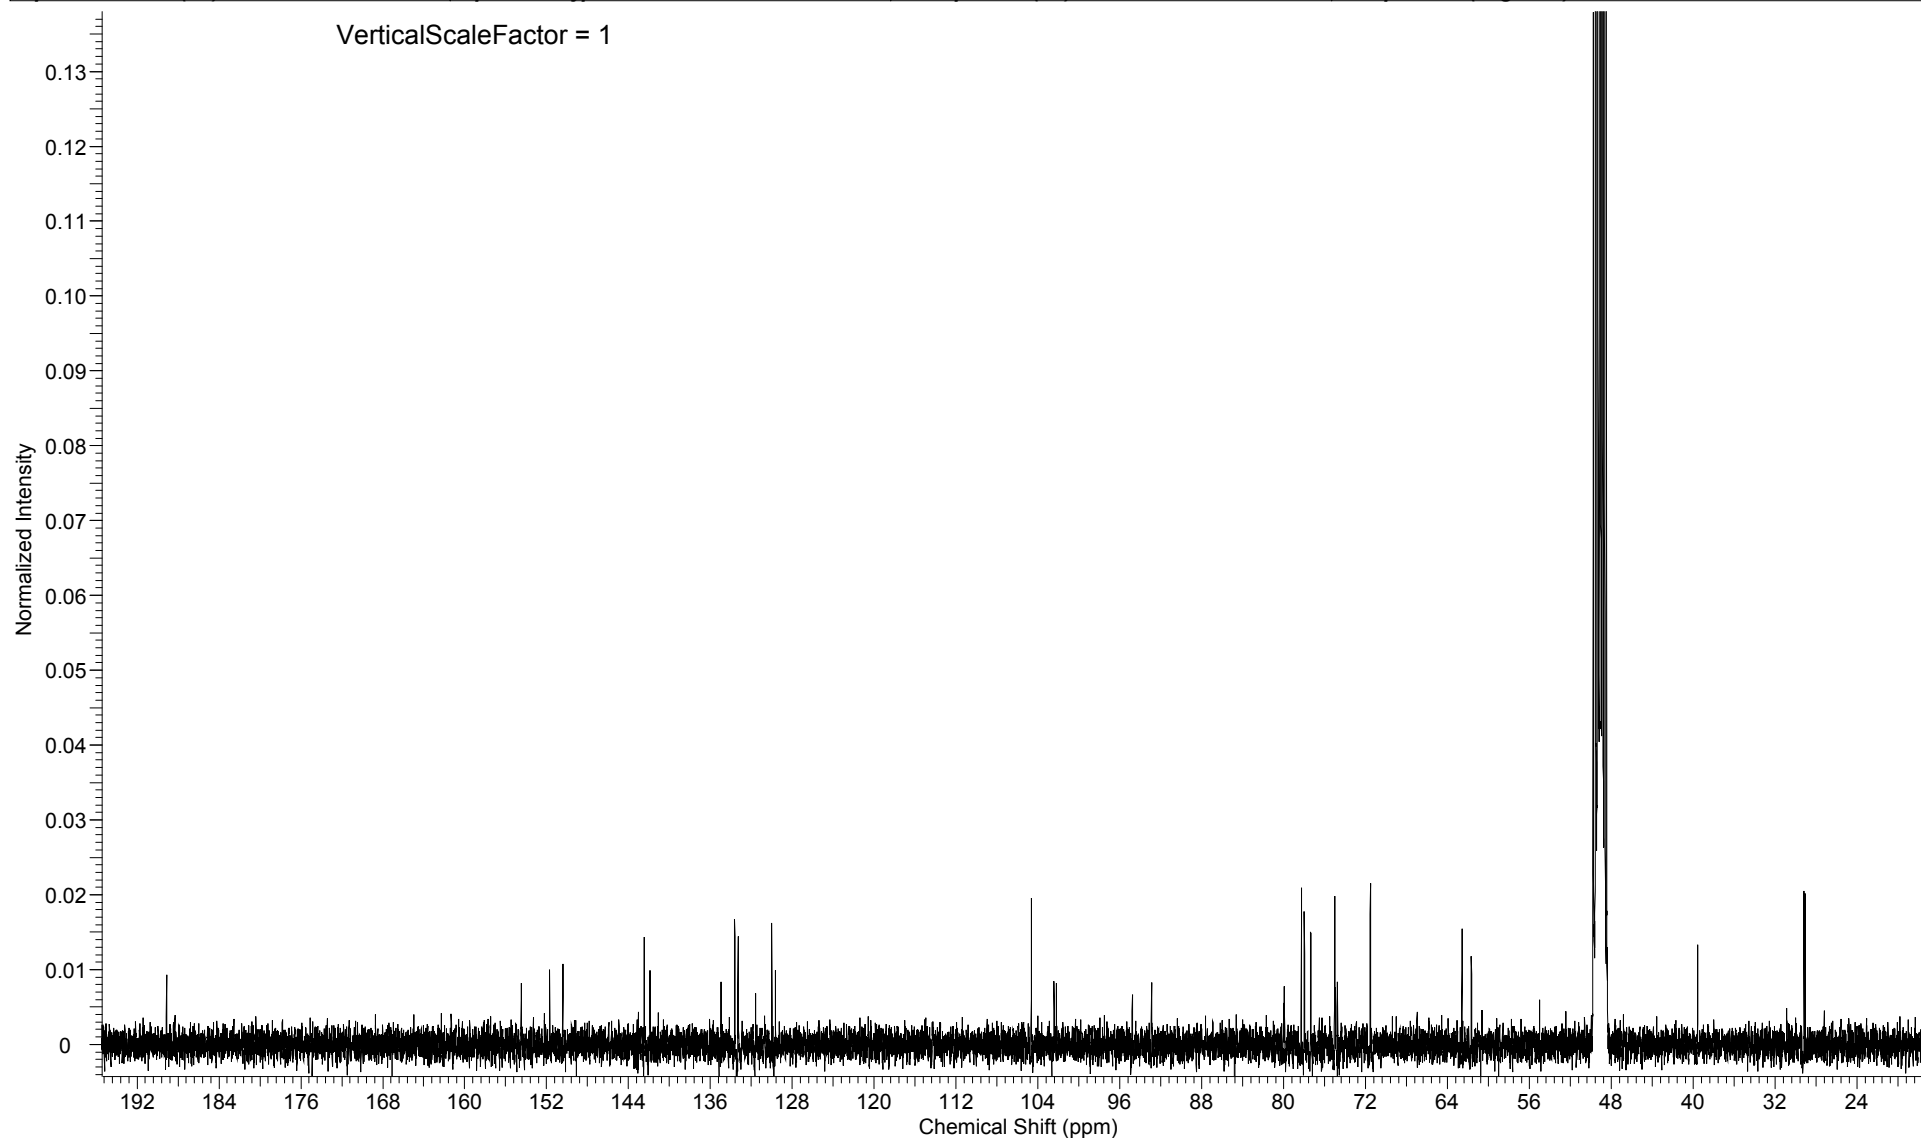

Supplement: c4cc03299c1.pdf [file c4cc03299c1.pdf]
